# Supplementary material
Source: PubMed Central journal article supplement (PMC5103285)
Supplement: NIHMS791706-supplement-2.pdf [file NIHMS791706-supplement-2.pdf]

## TCGAcore ERposHER2neg

| ID                     | logFC    | AveExpr  | t        | P.Value  | adj.P.Val | B        |
|------------------------|----------|----------|----------|----------|-----------|----------|
| ER-ALPHA               | -1.47787 | 2.329392 | -13.0975 | 4.26E-33 | 3.67E-32  | 64.22869 |
| E-CADHERIN             | -1.22659 | -0.46045 | -9.3146  | 6.99E-19 | 2.41E-18  | 31.77072 |
| GATA3                  | -1.16367 | 2.23077  | -15.4116 | 8.79E-43 | 1.24E-41  | 86.40257 |
| RBM15                  | -1.11316 | -0.57786 | -21.1748 | 3.30E-68 | 5.11E-66  | 144.68   |
| GAPDH                  | -1.03379 | -1.32903 | -10.8059 | 3.54E-24 | 1.57E-23  | 43.84258 |
| PREX1                  | -0.87698 | 1.128302 | -10.3882 | 1.20E-22 | 5.02E-22  | 40.35281 |
| S6                     | -0.87419 | -0.61792 | -17.4398 | 1.30E-51 | 3.36E-50  | 106.6347 |
| FASN                   | -0.85154 | 1.017666 | -7.77866 | 5.75E-14 | 1.44E-13  | 20.604   |
| CLAUDIN-7              | -0.84794 | 0.223816 | -11.7563 | 8.92E-28 | 5.18E-27  | 52.06148 |
| BETA-CATENIN           | -0.8032  | -0.5338  | -10.3218 | 2.08E-22 | 8.49E-22  | 39.80568 |
| B-RAF                  | -0.7698  | -0.08868 | -13.1798 | 1.97E-33 | 1.91E-32  | 64.99487 |
| CYCLIN_B1              | -0.74978 | -0.79457 | -10.1311 | 1.01E-21 | 4.00E-21  | 38.24524 |
| ER-ALPHA_PS118         | -0.64994 | 0.246366 | -12.3023 | 6.54E-30 | 4.83E-29  | 56.94143 |
| ACC1                   | -0.64121 | 0.278692 | -8.80308 | 3.53E-17 | 1.16E-16  | 27.89668 |
| 53BP1                  | -0.63321 | -0.16657 | -13.3574 | 3.72E-34 | 3.84E-33  | 66.6526  |
| MSH6                   | -0.62993 | -0.4227  | -16.1656 | 4.89E-46 | 9.48E-45  | 93.85875 |
| HER2                   | -0.60618 | 0.111709 | -11.3332 | 3.73E-26 | 1.81E-25  | 48.3577  |
| TRFC                   | -0.58968 | -1.15924 | -6.78674 | 3.93E-11 | 8.97E-11  | 14.19466 |
| VEGFR2                 | -0.57769 | 0.523007 | -11.9829 | 1.18E-28 | 7.59E-28  | 54.07375 |
| P62-LCK-LIGAND         | -0.57655 | 0.029411 | -9.41055 | 3.30E-19 | 1.17E-18  | 32.51356 |
| ACETYL-A-TUBULIN-LYS40 | -0.57415 | -0.49149 | -7.40857 | 7.09E-13 | 1.74E-12  | 18.13382 |
| ADAR1                  | -0.55347 | -0.02536 | -17.4412 | 1.28E-51 | 3.36E-50  | 106.6482 |
| P70S6K                 | -0.55154 | -0.00547 | -11.4446 | 1.41E-26 | 7.51E-26  | 49.32632 |
| EIF4G                  | -0.52184 | -0.20169 | -15.7917 | 2.03E-44 | 3.50E-43  | 90.15058 |
| KU80                   | -0.50507 | -0.24581 | -14.2234 | 9.63E-38 | 1.24E-36  | 74.86112 |
| INPP4B                 | -0.48913 | 1.53784  | -4.59577 | 5.71E-06 | 9.32E-06  | 2.646967 |
| AR                     | -0.48004 | 1.191528 | -6.3741  | 4.86E-10 | 1.02E-09  | 11.73375 |
| SYK                    | -0.44969 | -0.50943 | -6.63805 | 9.86E-11 | 2.15E-10  | 13.29348 |
| RB_PS807_S811          | -0.44786 | -0.28808 | -7.99003 | 1.32E-14 | 3.71E-14  | 22.05515 |
| ACC_PS79               | -0.42803 | 0.31349  | -5.87563 | 8.59E-09 | 1.64E-08  | 8.931756 |
| BAP1-C-4               | -0.4199  | -0.183   | -16.4264 | 3.59E-47 | 7.95E-46  | 96.45806 |
| TUBERIN                | -0.4187  | -0.01025 | -11.6373 | 2.57E-27 | 1.42E-26  | 51.01316 |
| CHK2                   | -0.40412 | -0.30038 | -11.3633 | 2.87E-26 | 1.43E-25  | 48.61902 |
| RAB-25                 | -0.40278 | 0.35453  | -6.92846 | 1.61E-11 | 3.78E-11  | 15.06846 |
| EEF2K                  | -0.4012  | 0.15602  | -7.98511 | 1.36E-14 | 3.77E-14  | 22.02104 |
| DVL3                   | -0.3816  | -0.15222 | -11.7551 | 9.02E-28 | 5.18E-27  | 52.05095 |
| BIM                    | -0.35006 | 0.460216 | -6.48228 | 2.54E-10 | 5.40E-10  | 12.36674 |
| NF2                    | -0.34381 | -0.36505 | -10.7043 | 8.40E-24 | 3.62E-23  | 42.9865  |
| AKT                    | -0.3373  | 0.057082 | -7.91422 | 2.24E-14 | 5.99E-14  | 21.53133 |
| 4E-BP1                 | -0.33522 | -0.05301 | -5.43388 | 9.37E-08 | 1.67E-07  | 6.610911 |

|                         |          |          |          |          |          |          |
|-------------------------|----------|----------|----------|----------|----------|----------|
| PTEN                    | -0.32431 | 0.122358 | -7.01587 | 9.23E-12 | 2.20E-11 | 15.61453 |
| GSK3-ALPHA-BETA_PS21_S9 | -0.32322 | 0.00609  | -4.54806 | 7.10E-06 | 1.13E-05 | 2.439189 |
| MSH2                    | -0.322   | -0.18713 | -9.9869  | 3.27E-21 | 1.24E-20 | 37.07729 |
| ATM                     | -0.31369 | -0.03282 | -5.1106  | 4.89E-07 | 8.42E-07 | 5.012476 |
| MYOSIN-IIA_PS1943       | -0.31205 | 0.006008 | -8.28904 | 1.56E-15 | 4.57E-15 | 24.15645 |
| GSK3-ALPHA-BETA         | -0.30386 | -0.13312 | -13.435  | 1.79E-34 | 1.98E-33 | 67.38074 |
| PDK1_PS241              | -0.30241 | 0.24186  | -8.61381 | 1.45E-16 | 4.49E-16 | 26.50118 |
| IGFBP2                  | -0.28285 | 0.41569  | -3.28776 | 0.001095 | 0.001502 | -2.32056 |
| ASNS                    | -0.2736  | -0.33848 | -5.45483 | 8.39E-08 | 1.51E-07 | 6.717439 |
| GAB2                    | -0.26298 | 0.061111 | -4.37603 | 1.53E-05 | 2.39E-05 | 1.706313 |
| STAT5-ALPHA             | -0.25683 | 0.304556 | -3.97853 | 8.17E-05 | 0.000121 | 0.112145 |
| GSK3_PS9                | -0.24689 | -0.07431 | -3.48122 | 0.000552 | 0.000777 | -1.68316 |
| PDCD4                   | -0.23963 | 0.075524 | -2.98247 | 0.003026 | 0.003942 | -3.25584 |
| PKC-PAN_BETAI_PS660     | -0.23882 | -0.20997 | -5.65029 | 2.96E-08 | 5.53E-08 | 7.728444 |
| SCD1                    | -0.23231 | -0.07492 | -4.8483  | 1.76E-06 | 2.96E-06 | 3.779261 |
| CIAP                    | -0.22978 | -0.01572 | -10.0228 | 2.44E-21 | 9.47E-21 | 37.36696 |
| RAPTOR                  | -0.22678 | 0.090651 | -7.82377 | 4.21E-14 | 1.09E-13 | 20.91126 |
| AMPK_PT172              | -0.22112 | 0.067264 | -3.88036 | 0.000121 | 0.000177 | -0.25992 |
| JNK2                    | -0.1918  | 0.260089 | -4.8349  | 1.87E-06 | 3.12E-06 | 3.717815 |
| P90RSK                  | -0.17123 | -0.02239 | -5.5394  | 5.37E-08 | 9.79E-08 | 7.151114 |
| YB-1                    | -0.15674 | -0.08013 | -4.86618 | 1.61E-06 | 2.75E-06 | 3.861462 |
| PRDX1                   | -0.15284 | 0.053405 | -4.59832 | 5.65E-06 | 9.31E-06 | 2.658134 |
| XRCC1                   | -0.15194 | 0.032348 | -5.88091 | 8.34E-09 | 1.62E-08 | 8.960412 |
| CHK1_PS345              | -0.13479 | -0.15713 | -5.28381 | 2.04E-07 | 3.59E-07 | 5.85825  |
| 14-3-3_ZETA             | -0.133   | 0.042917 | -3.03518 | 0.002554 | 0.003383 | -3.1006  |
| CYCLIN_E1               | -0.13252 | -0.78091 | -2.93127 | 0.00356  | 0.004599 | -3.40417 |
| BCL-2                   | -0.12934 | 0.839701 | -2.10084 | 0.036251 | 0.042568 | -5.46201 |
| 4E-BP1_PS65             | -0.1208  | -0.29849 | -3.7669  | 0.000189 | 0.000269 | -0.6792  |
| P53                     | -0.11471 | -0.1637  | -2.16332 | 0.031081 | 0.036775 | -5.33021 |
| FOXM1                   | -0.11273 | -0.20133 | -2.69245 | 0.007377 | 0.009372 | -4.06335 |
| HER3                    | -0.10798 | 0.334981 | -2.00923 | 0.045153 | 0.052622 | -5.64842 |
| BAD_PS112               | -0.10361 | -0.01811 | -4.01815 | 6.95E-05 | 0.000104 | 0.264765 |
| NF-KB-P65_PS536         | -0.10075 | 0.223391 | -1.38628 | 0.166399 | 0.186898 | -6.69878 |
| ERK2                    | -0.09994 | -0.25679 | -2.67545 | 0.007755 | 0.009773 | -4.10822 |
| PI3K-P110-ALPHA         | -0.09847 | 0.13909  | -3.87726 | 0.000123 | 0.000178 | -0.27155 |
| MTOR_PS2448             | -0.09469 | 0.036535 | -4.03639 | 6.45E-05 | 9.71E-05 | 0.335504 |
| AMPK_ALPHA              | -0.09374 | -0.16088 | -2.41009 | 0.016378 | 0.019528 | -4.77279 |
| P38_MAPK                | -0.08331 | 0.180511 | -2.99286 | 0.002927 | 0.003845 | -3.22544 |
| PKC-DELTA_PS664         | -0.08118 | -0.07202 | -3.84021 | 0.000142 | 0.000204 | -0.40963 |
| TSC1                    | -0.07934 | -0.11993 | -2.41604 | 0.016117 | 0.019365 | -4.75864 |
| PI3K-P85                | -0.07847 | 0.040492 | -2.4215  | 0.01588  | 0.01923  | -4.74561 |
| SMAD1                   | -0.06572 | 0.038361 | -2.80498 | 0.005266 | 0.006746 | -3.75948 |

|                       |          |          |          |          |          |          |
|-----------------------|----------|----------|----------|----------|----------|----------|
| S6_PS235_S236         | -0.05429 | -0.15885 | -0.78231 | 0.434474 | 0.479969 | -7.3518  |
| PCNA                  | -0.05184 | -0.15183 | -1.71536 | 0.087018 | 0.09991  | -6.19128 |
| BECLIN                | -0.05104 | 0.064736 | -1.69735 | 0.090373 | 0.102999 | -6.22181 |
| A-RAF_PS299           | -0.04832 | 0.102205 | -2.43931 | 0.015129 | 0.018465 | -4.70291 |
| S6_PS240_S244         | -0.04622 | -0.15324 | -0.62193 | 0.534324 | 0.571173 | -7.4643  |
| EIF4E                 | -0.04138 | 0.014772 | -1.72095 | 0.085998 | 0.099476 | -6.18175 |
| CHK2_PT68             | -0.03468 | -0.01061 | -0.96827 | 0.333469 | 0.371854 | -7.18931 |
| PDK1                  | -0.03307 | 0.224945 | -1.45213 | 0.147213 | 0.166555 | -6.60575 |
| CYCLIN_E2             | -0.03038 | -0.24618 | -0.73099 | 0.465194 | 0.50073  | -7.39059 |
| G6PD                  | -0.02505 | -0.08998 | -0.76572 | 0.444275 | 0.484948 | -7.36463 |
| PR                    | -0.01644 | 0.207545 | -0.50167 | 0.616161 | 0.645304 | -7.53182 |
| PRAS40_PT246          | -0.01436 | -0.09297 | -0.58079 | 0.561697 | 0.595325 | -7.48902 |
| 4E-BP1_PT37T46        | -0.01132 | -0.03487 | -0.15089 | 0.880133 | 0.885848 | -7.64626 |
| IRS1                  | -0.01005 | 0.349928 | -0.25854 | 0.796118 | 0.817208 | -7.62422 |
| PAXILLIN              | -0.00674 | -0.16124 | -0.17603 | 0.860356 | 0.871602 | -7.64215 |
| TRANSGLUTAMINASE      | -0.00097 | -0.47818 | -0.03133 | 0.975018 | 0.975018 | -7.65715 |
| HER2_PY1248           | 0.00948  | 0.213772 | 0.248714 | 0.803703 | 0.819566 | -7.62671 |
| BAX                   | 0.009946 | -0.18604 | 0.281138 | 0.778743 | 0.804701 | -7.61812 |
| CD49B                 | 0.016125 | 0.05436  | 0.475514 | 0.634668 | 0.660226 | -7.5446  |
| SRC                   | 0.027465 | -0.09195 | 0.739673 | 0.459912 | 0.498506 | -7.38421 |
| SRC_PY416             | 0.02836  | -0.09137 | 0.576482 | 0.564599 | 0.595325 | -7.49151 |
| CASPASE-7_CLEAVEDD198 | 0.046121 | -0.48931 | 0.778663 | 0.436617 | 0.479969 | -7.35465 |
| ANNEXIN_VII           | 0.049207 | 0.164025 | 2.479984 | 0.013531 | 0.016778 | -4.60428 |
| P27_PT157             | 0.06692  | 0.056068 | 3.404273 | 0.000727 | 0.001016 | -1.94081 |
| FOXO3A_PS318_S321     | 0.079899 | 0.091018 | 4.511026 | 8.39E-06 | 1.33E-05 | 2.279241 |
| C-JUN_PS73            | 0.082614 | 0.076393 | 3.223622 | 0.001365 | 0.001839 | -2.52427 |
| P27                   | 0.092287 | 0.261935 | 2.627799 | 0.008909 | 0.011137 | -4.23251 |
| DJ-1                  | 0.104936 | 0.212465 | 2.462851 | 0.014185 | 0.017449 | -4.64602 |
| P90RSK_PT359_S363     | 0.120697 | 0.090725 | 4.205641 | 3.19E-05 | 4.89E-05 | 1.005897 |
| JNK_PT183_Y185        | 0.129319 | 0.239133 | 4.32501  | 1.91E-05 | 2.96E-05 | 1.493915 |
| LKB1                  | 0.133883 | 0.064678 | 6.786479 | 3.93E-11 | 8.97E-11 | 14.19304 |
| CD31                  | 0.136101 | 0.07787  | 4.578699 | 6.18E-06 | 9.97E-06 | 2.57239  |
| XBP1                  | 0.145029 | 0.103234 | 3.193538 | 0.001511 | 0.00202  | -2.61849 |
| FOXO3A                | 0.145864 | 0.106185 | 6.091249 | 2.54E-09 | 5.17E-09 | 10.12038 |
| HEREGULIN             | 0.149827 | 0.011844 | 6.304845 | 7.32E-10 | 1.51E-09 | 11.3331  |
| C-RAF_PS338           | 0.160917 | -0.04441 | 7.878293 | 2.88E-14 | 7.57E-14 | 21.28441 |
| SMAD4                 | 0.168606 | -0.01695 | 8.302068 | 1.42E-15 | 4.32E-15 | 24.24926 |
| YB-1_PS102            | 0.169882 | -0.10752 | 8.031364 | 9.84E-15 | 2.83E-14 | 22.34224 |
| P38_PT180_Y182        | 0.179955 | 0.059588 | 3.25958  | 0.001207 | 0.001641 | -2.41054 |
| PEA-15                | 0.185421 | 0.066964 | 5.208103 | 3.00E-07 | 5.22E-07 | 5.485524 |
| ACVRL1                | 0.19428  | 0.130013 | 8.7603   | 4.86E-17 | 1.57E-16 | 27.57943 |
| PAI-1                 | 0.195978 | 0.300027 | 3.342767 | 0.000904 | 0.001251 | -2.14284 |

|                 |          |          |          |          |          |          |
|-----------------|----------|----------|----------|----------|----------|----------|
| MEK1            | 0.206621 | 0.262611 | 5.938091 | 6.06E-09 | 1.19E-08 | 9.272348 |
| MRE11           | 0.210467 | 0.166756 | 8.295591 | 1.49E-15 | 4.44E-15 | 24.2031  |
| NOTCH1          | 0.219709 | -0.03028 | 9.130268 | 2.92E-18 | 9.84E-18 | 30.35779 |
| RICTOR          | 0.233417 | -0.02818 | 4.089302 | 5.19E-05 | 7.88E-05 | 0.542354 |
| RICTOR_PT1135   | 0.235803 | 0.238993 | 6.016484 | 3.89E-09 | 7.73E-09 | 9.704136 |
| N-RAS           | 0.24384  | 0.10294  | 9.796257 | 1.53E-20 | 5.66E-20 | 35.54878 |
| PKC-ALPHA       | 0.278774 | -0.50222 | 8.708439 | 7.17E-17 | 2.27E-16 | 27.19626 |
| EGFR            | 0.317402 | -0.31204 | 11.38629 | 2.34E-26 | 1.21E-25 | 48.81838 |
| MEK1_PS217_S221 | 0.31852  | 0.209891 | 6.686524 | 7.32E-11 | 1.64E-10 | 13.58549 |
| EGFR_PY1068     | 0.330018 | 0.128377 | 6.527145 | 1.94E-10 | 4.17E-10 | 12.63182 |
| PKC-ALPHA_PS657 | 0.335489 | -0.34686 | 11.79481 | 6.33E-28 | 3.92E-27 | 52.40237 |
| LCK             | 0.345618 | -0.07552 | 7.971778 | 1.50E-14 | 4.07E-14 | 21.92867 |
| FIBRONECTIN     | 0.36569  | 0.785256 | 5.745123 | 1.77E-08 | 3.34E-08 | 8.229944 |
| P70S6K_PT389    | 0.367181 | 0.136735 | 9.409466 | 3.33E-19 | 1.17E-18 | 32.50512 |
| STATHMIN        | 0.383388 | 0.078961 | 12.23947 | 1.16E-29 | 8.16E-29 | 56.37461 |
| BID             | 0.391576 | 0.107778 | 13.99049 | 9.04E-37 | 1.08E-35 | 72.63482 |
| YAP_PS127       | 0.418742 | -0.15184 | 7.820426 | 4.31E-14 | 1.09E-13 | 20.88843 |
| NDRG1_PT346     | 0.425209 | 0.096139 | 6.67692  | 7.76E-11 | 1.72E-10 | 13.52749 |
| AKT_PT308       | 0.428396 | -0.26846 | 6.077756 | 2.74E-09 | 5.52E-09 | 10.04494 |
| N-CADHERIN      | 0.459833 | -0.01697 | 12.90719 | 2.51E-32 | 2.05E-31 | 62.46687 |
| STAT3_PY705     | 0.466684 | 0.219456 | 11.30641 | 4.72E-26 | 2.22E-25 | 48.12522 |
| AKT_PS473       | 0.469097 | -0.18021 | 5.626251 | 3.37E-08 | 6.22E-08 | 7.602438 |
| MAPK_PT202_Y204 | 0.537135 | 0.651044 | 7.391385 | 7.95E-13 | 1.93E-12 | 18.02136 |
| C-KIT           | 0.584921 | 0.349847 | 10.85862 | 2.26E-24 | 1.03E-23 | 44.28888 |
| RAB11           | 0.589801 | 0.331725 | 18.0575  | 2.44E-54 | 1.26E-52 | 112.8851 |
| SRC_PY527       | 0.695323 | 0.200456 | 12.38322 | 3.13E-30 | 2.42E-29 | 57.6737  |
| ANNEXIN-1       | 0.83727  | -0.23586 | 15.64956 | 8.34E-44 | 1.29E-42 | 88.74571 |
| HSP70           | 1.038068 | 0.524897 | 13.13263 | 3.07E-33 | 2.80E-32 | 64.55555 |
| COLLAGEN_VI     | 1.397229 | 0.964249 | 20.02665 | 4.31E-63 | 3.34E-61 | 132.9497 |
| CAVEOLIN-1      | 1.40624  | 0.241094 | 17.74688 | 5.76E-53 | 2.23E-51 | 109.738  |
| MYH11           | 1.54127  | 0.464146 | 12.08208 | 4.81E-29 | 3.24E-28 | 54.96051 |

## TCGA ERposHER2neg IDC

| Protein                | logFC   | AveExpr | t       | P.Value  | adj.P.Val | B       |
|------------------------|---------|---------|---------|----------|-----------|---------|
| ER-ALPHA               | -1.246  | 2.3384  | -7.624  | 2.98E-13 | 1.36E-12  | 19.3013 |
| RBM15                  | -1.0449 | -0.4532 | -14.928 | 2.11E-38 | 3.28E-36  | 76.555  |
| GATA3                  | -1.0446 | 2.27427 | -9.7867 | 6.69E-20 | 6.48E-19  | 34.3819 |
| GAPDH                  | -1.0169 | -1.2124 | -8.1547 | 8.62E-15 | 5.14E-14  | 22.7843 |
| E-CADHERIN             | -0.9745 | 0.01129 | -8.3528 | 2.21E-15 | 1.37E-14  | 24.1234 |
| S6                     | -0.8511 | -0.536  | -12.949 | 5.46E-31 | 2.11E-29  | 59.6421 |
| PREX1                  | -0.8199 | 1.21816 | -6.893  | 3.03E-11 | 1.12E-10  | 14.7717 |
| FASN                   | -0.768  | 1.08277 | -5.3762 | 1.49E-07 | 3.79E-07  | 6.49413 |
| BETA-CATENIN           | -0.7337 | -0.2796 | -9.4229 | 1.02E-18 | 7.54E-18  | 31.6914 |
| CLAUDIN-7              | -0.7205 | 0.29833 | -7.2937 | 2.50E-12 | 1.02E-11  | 17.2141 |
| CYCLIN_B1              | -0.7035 | -0.7161 | -6.9835 | 1.74E-11 | 6.58E-11  | 15.3146 |
| B-RAF                  | -0.6511 | -0.0081 | -8.059  | 1.65E-14 | 9.14E-14  | 22.1443 |
| 53BP1                  | -0.5992 | -0.1254 | -9.5517 | 3.92E-19 | 3.37E-18  | 32.6375 |
| MSH6                   | -0.5966 | -0.3542 | -10.596 | 1.30E-22 | 1.68E-21  | 40.5511 |
| HER2                   | -0.5874 | 0.14946 | -7.8665 | 6.02E-14 | 3.11E-13  | 20.8732 |
| ACETYL-A-TUBULIN-LYS40 | -0.5828 | -0.45   | -5.4549 | 9.98E-08 | 2.58E-07  | 6.88322 |
| ER-ALPHA_PS118         | -0.5719 | 0.26184 | -7.8604 | 6.27E-14 | 3.14E-13  | 20.833  |
| ACC1                   | -0.5646 | 0.31981 | -6.0123 | 5.10E-09 | 1.47E-08  | 9.76892 |
| KU80                   | -0.5631 | -0.2423 | -12.312 | 1.16E-28 | 3.59E-27  | 54.3367 |
| P62-LCK-LIGAND         | -0.5619 | 0.0997  | -6.6675 | 1.18E-10 | 3.98E-10  | 13.4417 |
| TRFC                   | -0.5278 | -1.0239 | -4.5964 | 6.25E-06 | 1.40E-05  | 2.8996  |
| INPP4B                 | -0.5104 | 1.54846 | -3.5304 | 0.00048  | 0.00078   | -1.2049 |
| ADAR1                  | -0.5081 | 0.00671 | -11.527 | 7.52E-26 | 1.46E-24  | 47.9247 |
| RAB-25                 | -0.4946 | 0.326   | -6.8573 | 3.77E-11 | 1.33E-10  | 14.5587 |
| P70S6K                 | -0.4873 | 0.05868 | -7.5494 | 4.85E-13 | 2.15E-12  | 18.824  |
| VEGFR2                 | -0.4849 | 0.58382 | -7.5039 | 6.51E-13 | 2.80E-12  | 18.5347 |
| TUBERIN                | -0.4585 | 0.00353 | -9.411  | 1.12E-18 | 7.86E-18  | 31.6043 |
| EIF4G                  | -0.4334 | -0.1392 | -9.6201 | 2.35E-19 | 2.14E-18  | 33.1427 |
| RB_PS807_S811          | -0.4282 | -0.2729 | -5.6061 | 4.56E-08 | 1.24E-07  | 7.64335 |
| ACC_PS79               | -0.4269 | 0.29751 | -4.352  | 1.83E-05 | 3.89E-05  | 1.87368 |
| AR                     | -0.4137 | 1.15674 | -3.9629 | 9.18E-05 | 0.00017   | 0.34321 |
| AKT                    | -0.3933 | 0.07297 | -6.7893 | 5.69E-11 | 1.96E-10  | 14.156  |
| CHK2                   | -0.3897 | -0.2927 | -7.9407 | 3.66E-14 | 1.96E-13  | 21.3611 |
| MSH2                   | -0.387  | -0.1816 | -9.4312 | 9.60E-19 | 7.44E-18  | 31.7525 |
| BAP1-C-4               | -0.3861 | -0.143  | -10.996 | 5.44E-24 | 7.66E-23  | 43.6897 |
| EEF2K                  | -0.3704 | 0.18135 | -5.5606 | 5.78E-08 | 1.54E-07  | 7.41297 |
| SYK                    | -0.3546 | -0.3992 | -4.068  | 6.01E-05 | 0.00012   | 0.74391 |
| PDCD4                  | -0.349  | 0.03953 | -3.4036 | 0.00075  | 0.00121   | -1.6276 |
| DVL3                   | -0.3352 | -0.0654 | -8.5513 | 5.54E-16 | 3.73E-15  | 25.4854 |
| ATM                    | -0.3235 | -0.0299 | -4.0008 | 7.89E-05 | 0.00015   | 0.48679 |

|                         |         |         |         |          |          |         |
|-------------------------|---------|---------|---------|----------|----------|---------|
| 4E-BP1                  | -0.3172 | -0.0098 | -3.7981 | 0.00018  | 0.00031  | -0.266  |
| GSK3-ALPHA-BETA         | -0.3155 | -0.1054 | -11.753 | 1.18E-26 | 3.05E-25 | 49.7586 |
| STAT5-ALPHA             | -0.3102 | 0.31693 | -3.5518 | 0.00044  | 0.00074  | -1.1323 |
| NF2                     | -0.2868 | -0.3292 | -6.5395 | 2.52E-10 | 8.31E-10 | 12.7012 |
| ASNS                    | -0.2862 | -0.3017 | -4.0054 | 7.74E-05 | 0.00015  | 0.50436 |
| BIM                     | -0.2844 | 0.48411 | -3.9533 | 9.54E-05 | 0.00018  | 0.30711 |
| AMPK_PT172              | -0.2779 | 0.0635  | -3.6884 | 0.00027  | 0.00046  | -0.6584 |
| PDK1_PS241              | -0.275  | 0.25979 | -5.8674 | 1.13E-08 | 3.18E-08 | 8.99707 |
| MYOSIN-IIA_PS1943       | -0.2541 | 0.08573 | -5.7528 | 2.09E-08 | 5.80E-08 | 8.39727 |
| GAB2                    | -0.2534 | 0.07591 | -3.1731 | 0.00166  | 0.00262  | -2.3593 |
| PKC-PAN_BETAI_PS660     | -0.2519 | -0.1942 | -4.3585 | 1.78E-05 | 3.83E-05 | 1.90038 |
| GSK3-ALPHA-BETA_PS21_S9 | -0.2392 | 0.04352 | -2.4872 | 0.0134   | 0.01854  | -4.2488 |
| PTEN                    | -0.2341 | 0.1896  | -4.1177 | 4.90E-05 | 9.87E-05 | 0.93684 |
| SCD1                    | -0.2339 | -0.0637 | -3.7426 | 0.00022  | 0.00038  | -0.4658 |
| CIAP                    | -0.2311 | -0.0059 | -7.7309 | 1.48E-13 | 6.95E-13 | 19.9899 |
| RAPTOR                  | -0.2287 | 0.11811 | -6.096  | 3.21E-09 | 9.56E-09 | 10.2215 |
| GSK3_PS9                | -0.2245 | -0.0341 | -2.3326 | 0.0203   | 0.0276   | -4.6139 |
| P90RSK                  | -0.2076 | -0.0377 | -5.5001 | 7.91E-08 | 2.08E-07 | 7.10863 |
| ERK2                    | -0.1883 | -0.2747 | -3.8011 | 0.00017  | 0.00031  | -0.2549 |
| TSC1                    | -0.1721 | -0.1037 | -4.2084 | 3.37E-05 | 6.96E-05 | 1.29415 |
| JNK2                    | -0.1659 | 0.25416 | -2.9877 | 0.00303  | 0.00466  | -2.9127 |
| XRCC1                   | -0.163  | 0.03051 | -4.6829 | 4.22E-06 | 9.63E-06 | 3.27472 |
| FOXO3A                  | -0.1486 | -0.2066 | -2.6307 | 0.00894  | 0.01273  | -3.8894 |
| AMPK_ALPHA              | -0.1381 | -0.1862 | -2.6654 | 0.00809  | 0.01172  | -3.7998 |
| PRDX1                   | -0.1269 | 0.08102 | -2.8575 | 0.00456  | 0.00679  | -3.2826 |
| PI3K-P110-ALPHA         | -0.1166 | 0.15441 | -3.5416 | 0.00046  | 0.00076  | -1.167  |
| YB-1                    | -0.1051 | -0.0221 | -2.5963 | 0.00987  | 0.01391  | -3.9773 |
| PI3K-P85                | -0.0873 | 0.04306 | -2.0569 | 0.04052  | 0.05368  | -5.209  |
| BAD_PS112               | -0.0852 | 0.00922 | -2.5865 | 0.01015  | 0.01417  | -4.0023 |
| P38_MAPK                | -0.0842 | 0.17976 | -2.3192 | 0.02103  | 0.02834  | -4.6445 |
| MTOR_PS2448             | -0.084  | 0.06681 | -2.7705 | 0.00593  | 0.00876  | -3.5211 |
| PKC-DELTA_PS664         | -0.0646 | -0.0668 | -2.4309 | 0.01562  | 0.02143  | -4.3842 |
| A-RAF_PS299             | -0.0514 | 0.11168 | -2.0469 | 0.0415   | 0.05452  | -5.2292 |
| FOXO3A_PS318_S321       | 0.06835 | 0.0821  | 2.8928  | 0.00409  | 0.00615  | -3.1838 |
| ANNEXIN_VII             | 0.07451 | 0.14639 | 2.72693 | 0.00675  | 0.00988  | -3.6378 |
| LKB1                    | 0.09517 | 0.04582 | 3.97714 | 8.67E-05 | 0.00016  | 0.39706 |
| XBP1                    | 0.10659 | 0.06737 | 2.63031 | 0.00895  | 0.01273  | -3.8905 |
| HEREGULIN               | 0.10957 | -0.0043 | 3.93463 | 0.0001   | 0.00019  | 0.23716 |
| YB-1_PS102              | 0.11747 | -0.1138 | 4.40271 | 1.47E-05 | 3.21E-05 | 2.08257 |
| FOXO3A                  | 0.12973 | 0.07687 | 4.51225 | 9.10E-06 | 2.01E-05 | 2.54091 |
| CD31                    | 0.13641 | 0.08273 | 3.57721 | 0.0004   | 0.00068  | -1.0453 |
| PEA-15                  | 0.14428 | 0.03995 | 2.98976 | 0.00301  | 0.00466  | -2.9067 |

|                 |         |         |         |          |          |         |
|-----------------|---------|---------|---------|----------|----------|---------|
| C-RAF_PS338     | 0.15519 | -0.0564 | 6.42739 | 4.85E-10 | 1.50E-09 | 12.0618 |
| ACVRL1          | 0.15575 | 0.1039  | 5.36957 | 1.54E-07 | 3.86E-07 | 6.46152 |
| PAI-1           | 0.16982 | 0.29665 | 2.13463 | 0.03357  | 0.04486  | -5.0486 |
| SMAD4           | 0.17588 | -0.0425 | 6.85768 | 3.76E-11 | 1.33E-10 | 14.5611 |
| MEK1_PS217_S221 | 0.17654 | 0.17151 | 2.98107 | 0.0031   | 0.00471  | -2.9319 |
| MRE11           | 0.18586 | 0.13866 | 6.05585 | 4.01E-09 | 1.17E-08 | 10.0039 |
| RICTOR_PT1135   | 0.20207 | 0.19342 | 5.04873 | 7.57E-07 | 1.81E-06 | 4.92642 |
| NOTCH1          | 0.20599 | -0.0539 | 6.36663 | 6.90E-10 | 2.10E-09 | 11.7188 |
| PKC-ALPHA       | 0.21649 | -0.5055 | 5.12579 | 5.21E-07 | 1.26E-06 | 5.28787 |
| MEK1            | 0.22048 | 0.25537 | 5.01995 | 8.70E-07 | 2.04E-06 | 4.79267 |
| N-RAS           | 0.22759 | 0.07413 | 7.46455 | 8.39E-13 | 3.52E-12 | 18.2857 |
| RICTOR          | 0.22988 | -0.0462 | 3.06241 | 0.00239  | 0.00374  | -2.6934 |
| P38_PT180_Y182  | 0.23017 | 0.07086 | 3.19067 | 0.00156  | 0.0025   | -2.3051 |
| PKC-ALPHA_PS657 | 0.25943 | -0.3613 | 6.5134  | 2.94E-10 | 9.49E-10 | 12.5516 |
| EGFR_PY1068     | 0.28366 | 0.07777 | 4.27806 | 2.51E-05 | 5.26E-05 | 1.57308 |
| EGFR            | 0.31288 | -0.3407 | 10.1223 | 5.17E-21 | 5.72E-20 | 36.9109 |
| YAP_PS127       | 0.33772 | -0.1903 | 4.85345 | 1.92E-06 | 4.44E-06 | 4.03141 |
| FIBRONECTIN     | 0.34293 | 0.8504  | 3.94427 | 9.89E-05 | 0.00018  | 0.27329 |
| STATHMIN        | 0.35739 | 0.03092 | 9.48362 | 6.50E-19 | 5.31E-18 | 32.1366 |
| STAT3_PY705     | 0.36239 | 0.16466 | 7.11382 | 7.76E-12 | 3.08E-11 | 16.1055 |
| P70S6K_PT389    | 0.36861 | 0.10684 | 7.76225 | 1.20E-13 | 5.82E-13 | 20.1933 |
| LCK             | 0.36995 | -0.0819 | 6.46089 | 3.99E-10 | 1.26E-09 | 12.252  |
| AKT_PT308       | 0.38861 | -0.3303 | 4.13717 | 4.53E-05 | 9.23E-05 | 1.01293 |
| AKT_PS473       | 0.39748 | -0.2386 | 3.58006 | 0.0004   | 0.00068  | -1.0355 |
| MAPK_PT202_Y204 | 0.40238 | 0.6254  | 4.10632 | 5.14E-05 | 0.0001   | 0.8925  |
| BID             | 0.40515 | 0.076   | 11.4343 | 1.60E-25 | 2.75E-24 | 47.1799 |
| NDRG1_PT346     | 0.46828 | 0.09135 | 5.36233 | 1.60E-07 | 3.94E-07 | 6.42602 |
| N-CADHERIN      | 0.47017 | -0.0374 | 10.0564 | 8.57E-21 | 8.86E-20 | 36.4108 |
| C-KIT           | 0.5435  | 0.31985 | 7.10118 | 8.40E-12 | 3.25E-11 | 16.0284 |
| RAB11           | 0.56888 | 0.27885 | 13.1899 | 7.07E-32 | 3.65E-30 | 61.6669 |
| SRC_PY527       | 0.62369 | 0.17237 | 8.06445 | 1.59E-14 | 9.14E-14 | 22.1808 |
| ANNEXIN-1       | 0.70205 | -0.2737 | 10.1553 | 4.01E-21 | 4.78E-20 | 37.1619 |
| CAVEOLIN-1      | 1.1772  | 0.09031 | 11.1906 | 1.14E-24 | 1.77E-23 | 45.2305 |
| HSP70           | 1.18419 | 0.49571 | 11.539  | 6.81E-26 | 1.46E-24 | 48.0229 |
| COLLAGEN_VI     | 1.37184 | 0.87111 | 14.1157 | 2.48E-35 | 1.92E-33 | 69.5491 |
| MYH11           | 1.47034 | 0.43778 | 8.44588 | 1.16E-15 | 7.47E-15 | 24.7595 |

## TCGA ERposHER2neg ILC

| Protein                 | logFC    | AveExpr  | t        | P.Value  | adj.P.Val | B        |
|-------------------------|----------|----------|----------|----------|-----------|----------|
| ER-ALPHA                | -1.34594 | 1.90153  | -6.36242 | 5.45E-09 | 6.50E-08  | 10.1921  |
| GATA3                   | -1.01189 | 1.87335  | -7.34376 | 4.86E-11 | 1.88E-09  | 14.7854  |
| GAPDH                   | -0.83429 | -1.67302 | -4.39739 | 2.66E-05 | 0.00011   | 2.01041  |
| RBM15                   | -0.82081 | -1.04267 | -7.17289 | 1.12E-10 | 3.48E-09  | 13.969   |
| CYCLIN_B1               | -0.73492 | -0.99933 | -6.06359 | 2.18E-08 | 2.11E-07  | 8.84721  |
| B-RAF                   | -0.67258 | -0.40525 | -6.48724 | 3.03E-09 | 3.91E-08  | 10.7622  |
| AR                      | -0.62448 | 1.21435  | -5.61118 | 1.68E-07 | 1.24E-06  | 6.87069  |
| ACETYL-A-TUBULIN-LYS40  | -0.60411 | -0.70694 | -4.13202 | 7.30E-05 | 0.00027   | 1.05128  |
| FASN                    | -0.58266 | 0.60153  | -2.69901 | 0.00812  | 0.01573   | -3.31756 |
| ACC1                    | -0.58258 | 0.02336  | -3.75904 | 0.00028  | 0.00083   | -0.22343 |
| S6                      | -0.54067 | -0.92084 | -4.95894 | 2.78E-06 | 1.43E-05  | 4.16959  |
| HER2                    | -0.50993 | -0.07688 | -5.71381 | 1.06E-07 | 8.68E-07  | 7.31227  |
| 53BP1                   | -0.48061 | -0.37568 | -5.10085 | 1.53E-06 | 8.19E-06  | 4.74077  |
| MSH6                    | -0.47706 | -0.66527 | -7.88609 | 3.29E-12 | 2.55E-10  | 17.4126  |
| VEGFR2                  | -0.46312 | 0.26407  | -5.46614 | 3.18E-07 | 2.24E-06  | 6.25388  |
| TRFC                    | -0.45791 | -1.5136  | -3.18333 | 0.00192  | 0.00461   | -2.00706 |
| EIF4G                   | -0.45554 | -0.43292 | -6.70682 | 1.07E-09 | 1.66E-08  | 11.776   |
| PREX1                   | -0.45181 | 0.76443  | -3.86185 | 0.0002   | 0.00061   | 0.11901  |
| ADAR1                   | -0.44755 | -0.18987 | -6.99426 | 2.68E-10 | 6.92E-09  | 13.1224  |
| CLAUDIN-7               | -0.44476 | -0.2197  | -3.76637 | 0.00028  | 0.00083   | -0.19927 |
| P62-LCK-LIGAND          | -0.44433 | -0.17604 | -4.40327 | 2.60E-05 | 0.00011   | 2.03212  |
| ER-ALPHA_PS118          | -0.44102 | 0.01334  | -5.35924 | 5.07E-07 | 3.27E-06  | 5.80496  |
| P70S6K                  | -0.43455 | -0.25298 | -5.3309  | 5.73E-07 | 3.42E-06  | 5.68678  |
| RAB-25                  | -0.42559 | 0.43233  | -3.51944 | 0.00064  | 0.00169   | -0.99406 |
| RB_PS807_S811           | -0.41684 | -0.41132 | -4.4184  | 2.45E-05 | 0.00011   | 2.08807  |
| GSK3-ALPHA-BETA_PS21_S9 | -0.39547 | -0.09347 | -3.48007 | 0.00073  | 0.00187   | -1.11689 |
| CHK2                    | -0.39118 | -0.33383 | -6.26102 | 8.75E-09 | 9.69E-08  | 9.73252  |
| EEF2K                   | -0.38942 | 0.04316  | -4.36159 | 3.05E-05 | 0.00012   | 1.87858  |
| SYK                     | -0.37205 | -0.70102 | -2.71749 | 0.00771  | 0.01552   | -3.27093 |
| KU80                    | -0.36178 | -0.30012 | -4.86439 | 4.10E-06 | 1.99E-05  | 3.79449  |
| PTEN                    | -0.35775 | -0.06919 | -4.00464 | 0.00012  | 0.00039   | 0.606    |
| TUBERIN                 | -0.34508 | -0.07704 | -5.34644 | 5.36E-07 | 3.32E-06  | 5.75156  |
| BAP1-C-4                | -0.32763 | -0.34282 | -6.18653 | 1.24E-08 | 1.28E-07  | 9.39695  |
| ACC_PS79                | -0.32513 | 0.19468  | -2.48    | 0.01475  | 0.02689   | -3.84879 |
| BIM                     | -0.32464 | 0.35357  | -3.5715  | 0.00054  | 0.00147   | -0.82994 |
| JNK2                    | -0.2862  | 0.24804  | -4.52844 | 1.59E-05 | 7.25E-05  | 2.49909  |
| PDK1_PS241              | -0.2834  | 0.17806  | -4.1114  | 7.88E-05 | 0.00028   | 0.97851  |
| DVL3                    | -0.28093 | -0.40597 | -4.12998 | 7.35E-05 | 0.00027   | 1.04409  |
| MYOSIN-IIA_PS1943       | -0.27645 | -0.22315 | -3.18132 | 0.00193  | 0.00461   | -2.01287 |
| NF2                     | -0.26517 | -0.52486 | -5.2779  | 7.20E-07 | 4.13E-06  | 5.46671  |
| HER3                    | -0.25026 | 0.24728  | -2.20683 | 0.02953  | 0.05143   | -4.45513 |
| GSK3-ALPHA-BETA         | -0.2282  | -0.2116  | -4.10694 | 8.01E-05 | 0.00028   | 0.96281  |
| AKT                     | -0.19992 | -0.03421 | -2.59461 | 0.01084  | 0.02074   | -3.5757  |
| P38_MAPK                | -0.1932  | 0.2412   | -3.48524 | 0.00072  | 0.00186   | -1.10083 |



|                   |          |          |          |          |          |          |
|-------------------|----------|----------|----------|----------|----------|----------|
| CHK1_PS345        | -0.18662 | -0.28962 | -3.39018 | 0.00099  | 0.00247  | -1.39326 |
| PRDX1             | -0.16402 | 0.00209  | -2.7079  | 0.00792  | 0.01573  | -3.29515 |
| RAPTOR            | -0.16361 | 0.00662  | -2.96885 | 0.00371  | 0.00846  | -2.60987 |
| CIAP              | -0.1506  | -0.09018 | -3.18722 | 0.0019   | 0.00461  | -1.99582 |
| SMAD4             | 0.11468  | 0.05129  | 2.48824  | 0.01443  | 0.02662  | -3.82953 |
| P27_PT157         | 0.13114  | 0.0869   | 2.75484  | 0.00694  | 0.01433  | -3.17587 |
| PEA-15            | 0.13741  | 0.2013   | 2.36203  | 0.02004  | 0.0357   | -4.11843 |
| C-RAF_PS338       | 0.146    | -0.00632 | 2.76618  | 0.00672  | 0.01407  | -3.1468  |
| HEREGULIN         | 0.15064  | 0.04012  | 2.88108  | 0.00482  | 0.01066  | -2.84636 |
| LKB1              | 0.16501  | 0.12122  | 3.68001  | 0.00037  | 0.00107  | -0.48192 |
| NOTCH1            | 0.16629  | 0.06295  | 3.63327  | 0.00044  | 0.00123  | -0.63282 |
| CD31              | 0.16955  | 0.05963  | 2.55823  | 0.01196  | 0.02261  | -3.66356 |
| P90RSK_PT359_S363 | 0.17102  | 0.15993  | 2.87157  | 0.00495  | 0.01066  | -2.87162 |
| P27               | 0.18012  | 0.31506  | 2.93073  | 0.00416  | 0.00934  | -2.7133  |
| ACVRL1            | 0.18139  | 0.2133   | 4.05559  | 9.69E-05 | 0.00033  | 0.7829   |
| MEK1              | 0.19865  | 0.29938  | 2.77324  | 0.00658  | 0.01397  | -3.12863 |
| N-RAS             | 0.19956  | 0.18664  | 3.58511  | 0.00052  | 0.00143  | -0.78676 |
| PAI-1             | 0.2039   | 0.36818  | 2.26843  | 0.02537  | 0.04469  | -4.32397 |
| PKC-ALPHA         | 0.21881  | -0.35765 | 2.72952  | 0.00745  | 0.0152   | -3.24044 |
| LCK               | 0.21953  | 0.12131  | 2.70029  | 0.00809  | 0.01573  | -3.31433 |
| MRE11             | 0.23386  | 0.23945  | 3.76428  | 0.00028  | 0.00083  | -0.20616 |
| EGFR              | 0.23769  | -0.21075 | 4.50186  | 1.77E-05 | 7.82E-05 | 2.39918  |
| YB-1_PS102        | 0.2429   | -0.08337 | 5.20321  | 9.92E-07 | 5.49E-06 | 5.1587   |
| EGFR_PY1068       | 0.24466  | 0.24214  | 3.09186  | 0.00255  | 0.006    | -2.26842 |
| P70S6K_PT389      | 0.26535  | 0.21416  | 2.87444  | 0.00491  | 0.01066  | -2.86399 |
| RICTOR            | 0.27153  | -0.00822 | 2.41399  | 0.01753  | 0.03159  | -4.00111 |
| NDRG1_PT346       | 0.2807   | 0.1716   | 2.52739  | 0.013    | 0.02428  | -3.7372  |
| STATHMIN          | 0.33115  | 0.24824  | 4.28683  | 4.07E-05 | 0.00016  | 1.60574  |
| BID               | 0.33577  | 0.20028  | 5.97732  | 3.24E-08 | 2.79E-07 | 8.46449  |
| PKC-ALPHA_PS657   | 0.33769  | -0.21073 | 6.89373  | 4.36E-10 | 8.44E-09 | 12.6491  |
| FIBRONECTIN       | 0.35281  | 0.70898  | 3.06821  | 0.00275  | 0.00636  | -2.33495 |
| N-CADHERIN        | 0.36373  | 0.08806  | 4.81606  | 5.00E-06 | 2.35E-05 | 3.60448  |
| MEK1_PS217_S221   | 0.37344  | 0.377    | 3.52927  | 0.00062  | 0.00166  | -0.96319 |
| YAP_PS127         | 0.38129  | 0.01222  | 3.949    | 0.00014  | 0.00045  | 0.41469  |
| STAT3_PY705       | 0.45115  | 0.3963   | 4.94413  | 2.95E-06 | 1.48E-05 | 4.1105   |
| RAB11             | 0.47744  | 0.51858  | 6.9327   | 3.61E-10 | 7.99E-09 | 12.8323  |
| C-KIT             | 0.51699  | 0.52364  | 6.5649   | 2.10E-09 | 2.96E-08 | 11.1192  |
| MAPK_PT202_Y204   | 0.54232  | 0.75809  | 4.18891  | 5.90E-05 | 0.00022  | 1.25337  |
| SRC_PY527         | 0.58031  | 0.38742  | 6.00135  | 2.90E-08 | 2.64E-07 | 8.57084  |
| ANNEXIN-1         | 0.77681  | 0.07426  | 7.62797  | 1.19E-11 | 6.16E-10 | 16.1559  |
| E-CADHERIN        | 0.77939  | -2.25052 | 3.94897  | 0.00014  | 0.00045  | 0.41461  |
| HSP70             | 0.81707  | 0.60344  | 5.36677  | 4.91E-07 | 3.27E-06 | 5.83641  |
| CAVEOLIN-1        | 1.15766  | 0.83832  | 6.86155  | 5.09E-10 | 8.76E-09 | 12.4982  |
| COLLAGEN_VI       | 1.23452  | 1.36855  | 9.28418  | 2.71E-15 | 4.20E-13 | 24.3531  |
| MYH11             | 1.33694  | 0.73535  | 5.615    | 1.65E-07 | 1.24E-06 | 6.88705  |

## MDA ERposHER2neg

| ID                     | logFC    | AveExpr  | t        | P.Value  | adj.P.Val | B        |
|------------------------|----------|----------|----------|----------|-----------|----------|
| ER-ALPHA               | -1.70232 | 1.635269 | -6.08426 | 7.26E-08 | 3.13E-07  | 7.760304 |
| GAPDH                  | -1.61232 | -1.85803 | -5.65301 | 3.93E-07 | 1.35E-06  | 6.116052 |
| PREX1                  | -1.5145  | 0.911309 | -6.5567  | 1.11E-08 | 5.92E-08  | 9.595865 |
| GATA3                  | -1.46363 | 1.740463 | -9.14899 | 3.11E-13 | 1.26E-11  | 19.8647  |
| E-CADHERIN             | -1.35675 | -0.39395 | -5.91397 | 1.42E-07 | 5.50E-07  | 7.106895 |
| 53BP1                  | -1.35224 | -0.97345 | -9.13754 | 3.25E-13 | 1.26E-11  | 19.81967 |
| FASN                   | -1.25973 | 0.926121 | -4.50797 | 2.85E-05 | 6.40E-05  | 1.976112 |
| S6                     | -1.16625 | -0.56191 | -8.69272 | 1.95E-12 | 3.77E-11  | 18.0644  |
| RBM15                  | -1.1424  | -0.91323 | -9.78658 | 2.45E-14 | 3.79E-12  | 22.35575 |
| AR                     | -1.10828 | 0.742751 | -6.79288 | 4.29E-09 | 2.56E-08  | 10.52335 |
| RAB-25                 | -1.01517 | 0.42674  | -6.70923 | 6.00E-09 | 3.45E-08  | 10.19422 |
| ACC1                   | -1.01249 | -0.09674 | -5.02256 | 4.35E-06 | 1.07E-05  | 3.787781 |
| BETA-CATENIN           | -0.96203 | -0.83705 | -7.1322  | 1.09E-09 | 9.38E-09  | 11.86389 |
| CLAUDIN-7              | -0.86047 | 0.002828 | -5.02817 | 4.25E-06 | 1.06E-05  | 3.808021 |
| HER2                   | -0.77562 | -0.39377 | -6.88703 | 2.93E-09 | 1.89E-08  | 10.89447 |
| P62-LCK-LIGAND         | -0.77528 | -0.4322  | -5.88726 | 1.58E-07 | 5.96E-07  | 7.004847 |
| TRFC                   | -0.75219 | -1.51135 | -3.93343 | 0.000209 | 0.000394  | 0.076323 |
| SYK                    | -0.7428  | -1.32419 | -3.91807 | 0.00022  | 0.000405  | 0.027582 |
| ATM                    | -0.73573 | -0.30075 | -4.61829 | 1.92E-05 | 4.44E-05  | 2.356587 |
| VEGFR2                 | -0.71583 | -0.04246 | -5.43465 | 9.13E-07 | 2.67E-06  | 5.298169 |
| P70S6K                 | -0.70578 | -0.47182 | -7.6521  | 1.32E-10 | 1.46E-09  | 13.92892 |
| CHK2                   | -0.70126 | -0.41264 | -7.04802 | 1.53E-09 | 1.13E-08  | 11.53059 |
| TUBERIN                | -0.66188 | -0.28751 | -7.28943 | 5.76E-10 | 5.25E-09  | 12.48739 |
| PK1_PS241              | -0.65558 | -0.06265 | -7.73723 | 9.36E-11 | 1.12E-09  | 14.26772 |
| KU80                   | -0.63995 | -0.25797 | -6.85739 | 3.31E-09 | 2.05E-08  | 10.77753 |
| CYCLIN_B1              | -0.61664 | -0.94364 | -4.37349 | 4.59E-05 | 9.76E-05  | 1.518725 |
| AKT                    | -0.6091  | -0.17082 | -6.41492 | 1.95E-08 | 9.76E-08  | 9.041927 |
| MSH6                   | -0.56257 | -0.81734 | -6.66455 | 7.18E-09 | 3.98E-08  | 10.01873 |
| EIF4G                  | -0.55785 | -0.58593 | -6.10566 | 6.67E-08 | 3.04E-07  | 7.842766 |
| ADAR1                  | -0.52062 | -0.14755 | -7.77729 | 7.95E-11 | 1.03E-09  | 14.42716 |
| EEF2K                  | -0.51036 | -0.25532 | -4.30552 | 5.83E-05 | 0.000122  | 1.290363 |
| B-RAF                  | -0.50713 | -0.70525 | -4.76711 | 1.12E-05 | 2.66E-05  | 2.876952 |
| PTEN                   | -0.50692 | -0.41933 | -5.42598 | 9.44E-07 | 2.71E-06  | 5.265894 |
| IGFBP2                 | -0.50019 | 0.208727 | -2.85258 | 0.005834 | 0.009227  | -3.03227 |
| BAP1-C-4               | -0.48953 | -0.49143 | -9.31144 | 1.62E-13 | 1.26E-11  | 20.50241 |
| ACC_PS79               | -0.47335 | 0.285251 | -2.62605 | 0.010794 | 0.016244  | -3.58973 |
| CYCLIN_E1              | -0.45638 | -0.79496 | -5.96334 | 1.17E-07 | 4.77E-07  | 7.295811 |
| ACETYL-A-TUBULIN-LYS40 | -0.45595 | -1.61022 | -2.47845 | 0.015843 | 0.02295   | -3.93302 |
| INPP4B                 | -0.4423  | 0.962554 | -1.8192  | 0.073559 | 0.094229  | -5.25811 |
| ER-ALPHA_PS118         | -0.43316 | 0.2055   | -3.92833 | 0.000212 | 0.000396  | 0.060127 |
| 4E-BP1                 | -0.43047 | -0.53803 | -3.57198 | 0.000679 | 0.001183  | -1.03824 |
| NF2                    | -0.41839 | -0.41895 | -5.80646 | 2.16E-07 | 7.80E-07  | 6.697062 |
| RB_PS807_S811          | -0.40075 | -0.74515 | -4.69296 | 1.46E-05 | 3.44E-05  | 2.616699 |
| PKC-PAN_BETAI_PS660    | -0.4003  | -0.29662 | -3.66364 | 0.000506 | 0.000902  | -0.76212 |

|                         |          |          |          |          |          |          |
|-------------------------|----------|----------|----------|----------|----------|----------|
| GSK3-ALPHA-BETA         | -0.39014 | -0.11984 | -5.12576 | 2.95E-06 | 7.50E-06 | 4.161549 |
| STAT5-ALPHA             | -0.36842 | -0.02703 | -2.61975 | 0.010976 | 0.016358 | -3.60473 |
| GAB2                    | -0.35141 | -0.2014  | -2.59593 | 0.011687 | 0.017252 | -3.66109 |
| RAPTOR                  | -0.35045 | 0.01141  | -5.52409 | 6.48E-07 | 2.14E-06 | 5.631827 |
| BIM                     | -0.348   | 0.290266 | -3.30939 | 0.001538 | 0.002564 | -1.80298 |
| BECLIN                  | -0.34611 | -0.10666 | -3.53234 | 0.00077  | 0.001326 | -1.15623 |
| MSH2                    | -0.34544 | -0.03193 | -5.45913 | 8.31E-07 | 2.48E-06 | 5.389289 |
| PDK1                    | -0.33222 | -0.03744 | -5.81128 | 2.12E-07 | 7.80E-07 | 6.715366 |
| P38_MAPK                | -0.32999 | 0.020254 | -4.79216 | 1.02E-05 | 2.47E-05 | 2.965322 |
| P90RSK                  | -0.32414 | -0.02205 | -4.12646 | 0.000108 | 0.00021  | 0.698258 |
| GSK3-ALPHA-BETA_PS21_S9 | -0.31662 | -1.00826 | -2.15475 | 0.03495  | 0.04752  | -4.62757 |
| AMPK_PT172              | -0.31471 | -0.12663 | -2.39266 | 0.019672 | 0.027719 | -4.12502 |
| PDCD4                   | -0.308   | 0.553829 | -1.74407 | 0.085948 | 0.107434 | -5.38622 |
| DVL3                    | -0.29939 | -0.44061 | -4.38751 | 4.37E-05 | 9.41E-05 | 1.566059 |
| GSK3_PS9                | -0.29807 | -0.74553 | -2.32645 | 0.023173 | 0.032358 | -4.26935 |
| CIAP                    | -0.28765 | -0.05195 | -5.61214 | 4.61E-07 | 1.55E-06 | 5.962118 |
| PI3K-P85                | -0.27857 | -0.06274 | -3.84986 | 0.000276 | 0.000502 | -0.18736 |
| PI3K-P110-ALPHA         | -0.27095 | 0.078958 | -4.2362  | 7.43E-05 | 0.000151 | 1.059465 |
| P53                     | -0.26083 | -0.20439 | -1.45987 | 0.149218 | 0.182116 | -5.82587 |
| BAX                     | -0.24894 | -0.12965 | -2.44086 | 0.017429 | 0.024785 | -4.01783 |
| SMAD1                   | -0.21221 | -0.03552 | -4.23103 | 7.56E-05 | 0.000152 | 1.042339 |
| JNK2                    | -0.20416 | 0.049246 | -3.18677 | 0.002225 | 0.003631 | -2.14604 |
| PRDX1                   | -0.20336 | 0.147561 | -2.83132 | 0.006189 | 0.009497 | -3.08612 |
| CHK1_PS345              | -0.19751 | -0.35009 | -4.39469 | 4.26E-05 | 9.35E-05 | 1.590343 |
| 14-3-3_ZETA             | -0.19097 | -0.21992 | -2.02219 | 0.04734  | 0.062716 | -4.88788 |
| S6_PS240_S244           | -0.18676 | -0.37931 | -1.35688 | 0.179587 | 0.215782 | -5.96722 |
| BAD_PS112               | -0.18497 | -0.17384 | -3.31966 | 0.001491 | 0.002512 | -1.77383 |
| P38_PT180_Y182          | -0.18195 | -0.18819 | -1.42609 | 0.158702 | 0.192178 | -5.8733  |
| HER3                    | -0.17889 | 0.014078 | -1.7471  | 0.085416 | 0.107434 | -5.38114 |
| MYOSIN-IIA_PS1943       | -0.173   | -0.12567 | -1.33542 | 0.186467 | 0.222326 | -5.99544 |
| TSC1                    | -0.1729  | -0.0242  | -2.44298 | 0.017336 | 0.024785 | -4.01308 |
| ANNEXIN_VII             | -0.14296 | 0.323153 | -2.1006  | 0.03962  | 0.053401 | -4.73563 |
| S6_PS235_S236           | -0.12766 | -0.02828 | -1.01865 | 0.312202 | 0.358455 | -6.36203 |
| MTOR_PS2448             | -0.12386 | -0.1351  | -1.91208 | 0.060344 | 0.079265 | -5.09303 |
| AMPK_ALPHA              | -0.11646 | -0.20177 | -1.46672 | 0.147347 | 0.18126  | -5.81611 |
| YB-1                    | -0.11066 | -0.48022 | -2.21991 | 0.029974 | 0.041115 | -4.49439 |
| CD49B                   | -0.10663 | 0.173772 | -1.15711 | 0.251528 | 0.295355 | -6.21343 |
| BCL-2                   | -0.09715 | 0.787522 | -0.89038 | 0.376599 | 0.422991 | -6.48334 |
| 4E-BP1_PS65             | -0.07165 | -0.68549 | -1.10809 | 0.271971 | 0.316959 | -6.26812 |
| PKC-DELTA_PS664         | -0.0693  | -0.08375 | -1.49384 | 0.14013  | 0.173761 | -5.77711 |
| 4E-BP1_PT37T46          | -0.06868 | -0.23662 | -0.50423 | 0.615828 | 0.65379  | -6.75175 |
| EIF4E                   | -0.06143 | -0.07708 | -0.85786 | 0.394172 | 0.439544 | -6.51157 |
| SRC                     | -0.0608  | -0.27068 | -0.64148 | 0.523502 | 0.571428 | -6.67314 |
| G6PD                    | -0.04138 | -0.00461 | -0.61871 | 0.538303 | 0.579424 | -6.68747 |
| PCNA                    | -0.04038 | 0.057377 | -0.69063 | 0.492294 | 0.541174 | -6.64047 |
| PAXILLIN                | -0.0244  | -0.43055 | -0.34247 | 0.733117 | 0.765151 | -6.82038 |

|                       |          |          |          |          |          |          |
|-----------------------|----------|----------|----------|----------|----------|----------|
| PEA-15                | -0.0232  | 0.231615 | -0.29871 | 0.766131 | 0.788174 | -6.83446 |
| A-RAF_PS299           | -0.0214  | 0.041049 | -0.62594 | 0.533578 | 0.578353 | -6.68297 |
| DJ-1                  | -0.01781 | 0.41669  | -0.15629 | 0.876298 | 0.881989 | -6.86699 |
| CYCLIN_E2             | -0.00412 | -0.09946 | -0.05611 | 0.955432 | 0.955432 | -6.87768 |
| CHK2_PT68             | 0.01819  | -0.02627 | 0.176916 | 0.860133 | 0.871377 | -6.86354 |
| P27                   | 0.026592 | 0.334827 | 0.339249 | 0.735533 | 0.765151 | -6.82148 |
| FIBRONECTIN           | 0.028883 | 0.793663 | 0.206946 | 0.836709 | 0.853223 | -6.85775 |
| NDRG1_PT346           | 0.033099 | -0.02629 | 0.296467 | 0.767834 | 0.788174 | -6.83513 |
| SCD1                  | 0.040949 | 0.072588 | 0.378201 | 0.706533 | 0.744984 | -6.80747 |
| ERK2                  | 0.049088 | -0.12702 | 0.583146 | 0.561844 | 0.600592 | -6.70883 |
| PRAS40_PT246          | 0.052528 | -0.17047 | 1.238943 | 0.219891 | 0.260176 | -6.11707 |
| XRCC1                 | 0.054078 | 0.221059 | 0.936267 | 0.352655 | 0.401923 | -6.44176 |
| ASNS                  | 0.059566 | -0.32934 | 0.711652 | 0.479266 | 0.530616 | -6.62577 |
| JNK_PT183_Y185        | 0.076367 | 0.272002 | 1.087721 | 0.280797 | 0.324803 | -6.29017 |
| C-JUN_PS73            | 0.104313 | 0.143415 | 1.805966 | 0.075625 | 0.096082 | -5.28103 |
| TRANSGLUTAMINASE      | 0.104766 | -0.53041 | 1.820733 | 0.073322 | 0.094229 | -5.25544 |
| CASPASE-7_CLEAVEDD198 | 0.113628 | 0.043761 | 0.901098 | 0.370914 | 0.419647 | -6.47381 |
| PKC-ALPHA_PS657       | 0.122281 | -0.30446 | 1.858219 | 0.067737 | 0.088229 | -5.18965 |
| XBP1                  | 0.149872 | 0.128772 | 2.045809 | 0.044889 | 0.059981 | -4.84255 |
| FOXO3A                | 0.16474  | 0.341718 | 4.202269 | 8.35E-05 | 0.000166 | 0.947216 |
| PR                    | 0.170886 | 0.130885 | 2.838205 | 0.006071 | 0.009411 | -3.0687  |
| FOXO3A_PS318_S321     | 0.17909  | 0.248724 | 5.29393  | 1.56E-06 | 4.18E-06 | 4.777196 |
| LCK                   | 0.209671 | -0.08992 | 3.238473 | 0.001906 | 0.003143 | -2.00252 |
| SRC_PY416             | 0.213827 | -0.26742 | 2.840857 | 0.006027 | 0.009411 | -3.06199 |
| IRS1                  | 0.242475 | 0.249789 | 3.147741 | 0.002499 | 0.004034 | -2.25328 |
| CD31                  | 0.250483 | 0.154889 | 5.201135 | 2.22E-06 | 5.74E-06 | 4.436514 |
| FOXM1                 | 0.258302 | -0.04693 | 3.068253 | 0.003155 | 0.005042 | -2.46869 |
| HER2_PY1248           | 0.268134 | 0.012439 | 4.10881  | 0.000115 | 0.000221 | 0.640667 |
| SMAD4                 | 0.271174 | 0.313121 | 6.903602 | 2.74E-09 | 1.85E-08 | 10.95986 |
| NOTCH1                | 0.285665 | 0.112829 | 6.546545 | 1.15E-08 | 5.96E-08 | 9.556114 |
| ACVRL1                | 0.286088 | 0.348654 | 7.408833 | 3.55E-10 | 3.44E-09 | 12.96157 |
| N-RAS                 | 0.303779 | 0.338828 | 5.694545 | 3.35E-07 | 1.18E-06 | 6.272822 |
| YAP_PS127             | 0.307489 | 0.233116 | 2.507184 | 0.014718 | 0.021522 | -3.86746 |
| P27_PT157             | 0.315172 | 0.241978 | 6.023398 | 9.24E-08 | 3.87E-07 | 7.526197 |
| LKB1                  | 0.348537 | 0.250803 | 6.156562 | 5.46E-08 | 2.56E-07 | 8.039176 |
| RICTOR                | 0.35564  | 0.101047 | 2.223288 | 0.029734 | 0.041115 | -4.48738 |
| EGFR                  | 0.35996  | -0.17669 | 7.091672 | 1.28E-09 | 1.05E-08 | 11.70337 |
| AKT_PS473             | 0.360361 | -0.23808 | 2.780861 | 0.007113 | 0.010808 | -3.21267 |
| C-RAF_PS338           | 0.388597 | 0.14839  | 5.376759 | 1.14E-06 | 3.15E-06 | 5.083224 |
| MRE11                 | 0.391126 | 0.404603 | 6.991907 | 1.92E-09 | 1.35E-08 | 11.30867 |
| PAI-1                 | 0.392658 | 0.739378 | 3.319965 | 0.001489 | 0.002512 | -1.77297 |
| N-CADHERIN            | 0.397081 | 0.084499 | 7.567317 | 1.87E-10 | 1.93E-09 | 13.59165 |
| P90RSK_PT359_S363     | 0.401829 | 0.356657 | 5.467694 | 8.04E-07 | 2.44E-06 | 5.421207 |
| HEREGULIN             | 0.423466 | 0.21423  | 5.502154 | 7.05E-07 | 2.28E-06 | 5.549813 |
| PKC-ALPHA             | 0.425819 | -0.07682 | 5.261392 | 1.77E-06 | 4.65E-06 | 4.65747  |
| MEK1                  | 0.427392 | 0.050376 | 3.698744 | 0.000452 | 0.000815 | -0.65517 |

|                 |          |          |          |          |          |          |
|-----------------|----------|----------|----------|----------|----------|----------|
| BID             | 0.452756 | 0.217478 | 8.214726 | 1.35E-11 | 2.09E-10 | 16.16767 |
| EGFR_PY1068     | 0.462252 | 0.371107 | 5.324948 | 1.39E-06 | 3.78E-06 | 4.891587 |
| MAPK_PT202_Y204 | 0.491236 | 0.78344  | 3.655285 | 0.00052  | 0.000916 | -0.78748 |
| STAT3_PY705     | 0.496915 | 0.449737 | 4.3933   | 4.28E-05 | 9.35E-05 | 1.585649 |
| YB-1_PS102      | 0.511282 | 0.118834 | 8.400614 | 6.34E-12 | 1.09E-10 | 16.90625 |
| STATHMIN        | 0.528668 | 0.45219  | 7.941858 | 4.08E-11 | 5.75E-10 | 15.08214 |
| P70S6K_PT389    | 0.529282 | 0.429873 | 5.923168 | 1.37E-07 | 5.45E-07 | 7.142046 |
| AKT_PT308       | 0.531412 | -0.34124 | 5.487672 | 7.45E-07 | 2.31E-06 | 5.495729 |
| SRC_PY527       | 0.538109 | 0.163928 | 4.240991 | 7.31E-05 | 0.000151 | 1.075365 |
| RICTOR_PT1135   | 0.539182 | 0.3585   | 8.939524 | 7.20E-13 | 2.06E-11 | 19.03974 |
| MEK1_PS217_S221 | 0.542806 | 0.595416 | 5.491042 | 7.35E-07 | 2.31E-06 | 5.508311 |
| C-KIT           | 0.579596 | 0.518908 | 5.391573 | 1.08E-06 | 3.04E-06 | 5.138144 |
| RAB11           | 0.594689 | 0.48491  | 8.914    | 7.98E-13 | 2.06E-11 | 18.93903 |
| CAVEOLIN-1      | 0.824185 | 0.494789 | 4.517595 | 2.75E-05 | 6.28E-05 | 2.009123 |
| HSP70           | 1.00054  | 0.467651 | 6.191276 | 4.76E-08 | 2.30E-07 | 8.173361 |
| ANNEXIN-1       | 1.037241 | 0.144028 | 7.069017 | 1.41E-09 | 1.09E-08 | 11.61368 |
| NF-KB-P65_PS536 | 1.05101  | 0.401213 | 6.09686  | 6.91E-08 | 3.06E-07 | 7.808836 |
| MYH11           | 1.265174 | 1.309184 | 4.157838 | 9.74E-05 | 0.000191 | 0.800993 |
| COLLAGEN_VI     | 1.406208 | 1.444602 | 8.720104 | 1.74E-12 | 3.77E-11 | 18.17277 |

## MDA ERposHER2neg IDC

| Protein                | logFC     | AveExpr   | t         | P.Value   | adj.P.Val | B         |
|------------------------|-----------|-----------|-----------|-----------|-----------|-----------|
| VHL                    | -2.4904   | 0.385762  | -7.348099 | 2.20E-09  | 2.46E-08  | 11.278455 |
| ER-ALPHA               | -2.003231 | 1.8634202 | -5.241879 | 3.55E-06  | 1.42E-05  | 4.0508694 |
| GATA3                  | -1.812986 | 1.8725389 | -9.946989 | 3.15E-13  | 4.91E-11  | 19.97361  |
| E-CADHERIN             | -1.789335 | -0.162202 | -8.314164 | 7.63E-11  | 2.41E-09  | 14.582639 |
| PREX1                  | -1.726587 | 1.098124  | -5.273034 | 3.19E-06  | 1.31E-05  | 4.1551422 |
| GAPDH                  | -1.665362 | -1.707897 | -4.382864 | 6.39E-05  | 0.0001811 | 1.2546015 |
| 53BP1                  | -1.618167 | -0.878014 | -8.31047  | 7.73E-11  | 2.41E-09  | 14.570131 |
| AR                     | -1.468365 | 0.8243346 | -7.377049 | 1.99E-09  | 2.39E-08  | 11.378247 |
| FASN                   | -1.281729 | 1.1256599 | -3.385322 | 0.0014287 | 0.0029327 | -1.704012 |
| S6                     | -1.224125 | -0.421257 | -7.018688 | 7.02E-09  | 6.85E-08  | 10.141025 |
| RAB-25                 | -1.177062 | 0.4272499 | -5.734147 | 6.44E-07  | 2.96E-06  | 5.7144782 |
| RBM15                  | -1.17559  | -0.790538 | -7.146824 | 4.47E-09  | 4.65E-08  | 10.583827 |
| BETA-CATENIN           | -1.030458 | -0.692578 | -6.317127 | 8.33E-08  | 5.20E-07  | 7.7157469 |
| ACC1                   | -0.972898 | 0.0604559 | -3.584604 | 0.0007899 | 0.0017115 | -1.145885 |
| CLAUDIN-7              | -0.965566 | 0.166072  | -4.073096 | 0.0001736 | 0.0004368 | 0.2951693 |
| VEGFR2                 | -0.95317  | 0.0585488 | -6.171141 | 1.39E-07  | 7.76E-07  | 7.2125495 |
| ATM                    | -0.885196 | -0.24283  | -4.629429 | 2.83E-05  | 8.83E-05  | 2.0391689 |
| TRFC                   | -0.862789 | -1.411131 | -3.308639 | 0.0017868 | 0.0035736 | -1.913633 |
| P62-LCK-LIGAND         | -0.810276 | -0.370868 | -4.928905 | 1.03E-05  | 3.51E-05  | 3.0129975 |
| CHK2                   | -0.806019 | -0.338167 | -6.036131 | 2.24E-07  | 1.16E-06  | 6.7482057 |
| KU80                   | -0.788392 | -0.213895 | -8.913862 | 9.83E-12  | 7.67E-10  | 16.596109 |
| IGFBP2                 | -0.763198 | 0.290107  | -3.648265 | 0.0006515 | 0.0014315 | -0.963718 |
| HER2                   | -0.717378 | -0.316384 | -4.22472  | 0.0001068 | 0.0002823 | 0.7608478 |
| PKD1_PS241             | -0.711974 | 0.0070239 | -6.679926 | 2.32E-08  | 1.90E-07  | 8.9693716 |
| INPP4B                 | -0.668853 | 0.915462  | -2.220991 | 0.031123  | 0.0475999 | -4.517804 |
| TUBERIN                | -0.647844 | -0.215072 | -5.781927 | 5.45E-07  | 2.66E-06  | 5.8774978 |
| BIM                    | -0.600257 | 0.3325017 | -4.800273 | 1.60E-05  | 5.30E-05  | 2.5921563 |
| P70S6K                 | -0.59065  | -0.369956 | -4.719962 | 2.09E-05  | 6.66E-05  | 2.3313183 |
| PDCD4                  | -0.583963 | 0.5179995 | -2.733358 | 0.0087622 | 0.0153585 | -3.383784 |
| MSH6                   | -0.554107 | -0.750704 | -4.498054 | 4.37E-05  | 0.0001289 | 1.6190195 |
| BAP1-C-4               | -0.554039 | -0.44046  | -7.927073 | 2.91E-10  | 6.49E-09  | 13.266136 |
| EIF4G                  | -0.519422 | -0.500312 | -4.307136 | 8.17E-05  | 0.0002199 | 1.0171853 |
| ADAR1                  | -0.514032 | -0.094399 | -5.125958 | 5.29E-06  | 1.96E-05  | 3.664342  |
| CYCLIN_B1              | -0.485793 | -0.878323 | -2.507289 | 0.0156177 | 0.0264822 | -3.906354 |
| ACETYL-A-TUBULIN-LYS40 | -0.467477 | -1.52614  | -1.807946 | 0.0769073 | 0.1071209 | -5.291596 |
| AKT                    | -0.467418 | -0.091268 | -3.759679 | 0.0004634 | 0.001063  | -0.640636 |
| ER-ALPHA_PS118         | -0.451313 | 0.2720109 | -2.832016 | 0.0067497 | 0.012103  | -3.145432 |
| GSK3-ALPHA-BETA        | -0.442898 | -0.078754 | -6.459256 | 5.05E-08  | 3.42E-07  | 8.2064771 |
| NF2                    | -0.442072 | -0.359981 | -4.591247 | 3.21E-05  | 9.83E-05  | 1.9165831 |
| RAPTOR                 | -0.440279 | 0.039402  | -5.32245  | 2.69E-06  | 1.13E-05  | 4.3208447 |
| P90RSK                 | -0.415049 | 0.0169247 | -4.115132 | 0.0001518 | 0.0003882 | 0.4234775 |
| RB_PS807_S811          | -0.408529 | -0.701205 | -3.427587 | 0.0012617 | 0.0026244 | -1.587228 |
| EEF2K                  | -0.392676 | -0.181656 | -2.222762 | 0.0309952 | 0.0475999 | -4.514203 |
| MSH2                   | -0.392123 | 0.0197661 | -5.001174 | 8.09E-06  | 2.81E-05  | 3.250991  |

|                         |           |           |           |           |           |           |
|-------------------------|-----------|-----------|-----------|-----------|-----------|-----------|
| SYK                     | -0.375359 | -1.174417 | -1.471484 | 0.147712  | 0.1952803 | -5.81884  |
| B-RAF                   | -0.361739 | -0.610804 | -2.339285 | 0.0235467 | 0.0374826 | -4.272257 |
| CIAP                    | -0.360447 | -0.022159 | -5.424547 | 1.89E-06  | 8.20E-06  | 4.6643768 |
| PRDX1                   | -0.35623  | 0.1848335 | -4.063453 | 0.000179  | 0.0004432 | 0.2658219 |
| CYCLIN_E1               | -0.347756 | -0.714016 | -3.03041  | 0.0039337 | 0.0073054 | -2.648276 |
| PI3K-P110-ALPHA         | -0.347056 | 0.1194193 | -4.359832 | 6.88E-05  | 0.0001884 | 1.1822094 |
| PTEN                    | -0.339665 | -0.343287 | -2.742193 | 0.0085617 | 0.0151775 | -3.362689 |
| AMPK_PT172              | -0.327665 | -0.095243 | -1.935764 | 0.0588215 | 0.0857584 | -5.066514 |
| ACC_PS79                | -0.315119 | 0.3791957 | -1.26797  | 0.2109484 | 0.2653867 | -6.089731 |
| PKC-PAN_BETAI_PS660     | -0.307024 | -0.252356 | -2.101069 | 0.0409318 | 0.0602393 | -4.756131 |
| P38_MAPK                | -0.305066 | 0.0439464 | -3.531936 | 0.0009253 | 0.0019598 | -1.29521  |
| PDK1                    | -0.300292 | 0.0099318 | -3.841558 | 0.0003597 | 0.0008632 | -0.399879 |
| BAX                     | -0.294101 | -0.10906  | -2.145969 | 0.0369805 | 0.0554708 | -4.668171 |
| PI3K-P85                | -0.292828 | -0.033351 | -3.330243 | 0.0016781 | 0.0033998 | -1.854877 |
| BECLIN                  | -0.251778 | -0.056458 | -1.857736 | 0.0693705 | 0.1002018 | -5.205496 |
| 4E-BP1                  | -0.242138 | -0.464909 | -1.449972 | 0.1535946 | 0.199673  | -5.849222 |
| JNK2                    | -0.226763 | 0.0779383 | -2.583271 | 0.0129015 | 0.0221168 | -3.734486 |
| DVL3                    | -0.225852 | -0.402048 | -2.276742 | 0.0273178 | 0.0426158 | -4.403353 |
| GSK3_PS9                | -0.221595 | -0.713301 | -1.257057 | 0.2148393 | 0.2681194 | -6.103201 |
| 14-3-3_ZETA             | -0.221416 | -0.173568 | -1.831653 | 0.0732368 | 0.1038631 | -5.250852 |
| CHK1_PS345              | -0.215801 | -0.334289 | -3.818981 | 0.0003858 | 0.0008983 | -0.466536 |
| BCL-2                   | -0.210738 | 0.7993853 | -1.451749 | 0.153102  | 0.199673  | -5.846729 |
| TSC1                    | -0.207935 | -0.009938 | -2.613018 | 0.011961  | 0.0207323 | -3.666147 |
| ANNEXIN_VII             | -0.206215 | 0.3505051 | -2.334804 | 0.0238006 | 0.0375039 | -4.281744 |
| CD49B                   | -0.206063 | 0.1738104 | -1.741746 | 0.0879836 | 0.1203986 | -5.40291  |
| GSK3-ALPHA-BETA_PS21_S9 | -0.200413 | -0.989056 | -0.995285 | 0.324608  | 0.3807432 | -6.393225 |
| BAD_PS112               | -0.184289 | -0.16688  | -2.496672 | 0.0160361 | 0.0268992 | -3.930059 |
| MTOR_PS2448             | -0.183629 | -0.114011 | -2.125273 | 0.0387582 | 0.0575836 | -4.708906 |
| MYOSIN-IIA_PS1943       | -0.165183 | -0.082959 | -0.97472  | 0.3346049 | 0.3893512 | -6.413284 |
| SMAD1                   | -0.164563 | -0.019014 | -2.340807 | 0.0234611 | 0.0374826 | -4.269034 |
| DJ-1                    | -0.13975  | 0.4129403 | -0.969979 | 0.3369385 | 0.3893512 | -6.417851 |
| S6_PS235_S236           | -0.135965 | 0.0390371 | -1.007567 | 0.3187345 | 0.3795617 | -6.381055 |
| GAB2                    | -0.133913 | -0.108557 | -0.714978 | 0.4780991 | 0.5365717 | -6.631664 |
| S6_PS240_S244           | -0.110654 | -0.286453 | -0.747615 | 0.4583535 | 0.5181387 | -6.607816 |
| G6PD                    | -0.097584 | -0.010335 | -1.12174  | 0.2675751 | 0.3261072 | -6.261103 |
| PCNA                    | -0.094612 | 0.0516551 | -1.176732 | 0.2451276 | 0.3011016 | -6.198974 |
| PEA-15                  | -0.093777 | 0.2275949 | -1.000951 | 0.3218893 | 0.3804146 | -6.387628 |
| EIF4E                   | -0.07551  | -0.076058 | -0.793115 | 0.4316289 | 0.4914899 | -6.572835 |
| 4E-BP1_PT37T46          | -0.07431  | -0.169766 | -0.393869 | 0.6954288 | 0.7586496 | -6.810311 |
| FIBRONECTIN             | -0.063422 | 0.7964677 | -0.330756 | 0.7422739 | 0.7985844 | -6.833353 |
| AMPK_ALPHA              | -0.06201  | -0.18449  | -0.57739  | 0.5663854 | 0.6266392 | -6.720713 |
| YB-1                    | -0.053952 | -0.457229 | -0.80315  | 0.4258629 | 0.4884898 | -6.564849 |
| STAT5-ALPHA             | -0.04923  | 0.0053378 | -0.262017 | 0.7944339 | 0.8447041 | -6.853902 |
| 4E-BP1_PS65             | -0.047022 | -0.657159 | -0.546884 | 0.5870016 | 0.644875  | -6.737926 |
| A-RAF_PS299             | -0.046764 | 0.0481146 | -1.071412 | 0.2893629 | 0.3499273 | -6.31549  |
| NDRG1_PT346             | -0.040567 | 0.0017381 | -0.260012 | 0.7959712 | 0.8447041 | -6.854431 |

|                       |           |           |           |           |           |           |
|-----------------------|-----------|-----------|-----------|-----------|-----------|-----------|
| SRC                   | -0.021379 | -0.253925 | -0.159348 | 0.8740657 | 0.8970674 | -6.875739 |
| P53                   | -0.018672 | -0.158446 | -0.092935 | 0.9263439 | 0.9445075 | -6.884201 |
| XRCC1                 | -0.0044   | 0.2045835 | -0.058221 | 0.9538151 | 0.9662023 | -6.886852 |
| PAXILLIN              | 0.0037106 | -0.40964  | 0.0390918 | 0.96898   | 0.9723279 | -6.887793 |
| P38_PT180_Y182        | 0.0054809 | -0.18856  | 0.0348709 | 0.9723279 | 0.9723279 | -6.88795  |
| PKC-DELTA_PS664       | 0.0136919 | -0.074865 | 0.2406758 | 0.8108354 | 0.8546644 | -6.859316 |
| P27                   | 0.016722  | 0.3227916 | 0.1711629 | 0.864818  | 0.8934543 | -6.873767 |
| CYCLIN_E2             | 0.0175092 | -0.073456 | 0.1855767 | 0.8535617 | 0.8877042 | -6.871171 |
| ERK2                  | 0.0194083 | -0.117506 | 0.2059491 | 0.8377051 | 0.8770604 | -6.867144 |
| HER3                  | 0.049387  | 0.0847051 | 0.3491675 | 0.7284967 | 0.7892047 | -6.827044 |
| PRAS40_PT246          | 0.0974554 | -0.155668 | 1.7315734 | 0.089798  | 0.1218129 | -5.419692 |
| TRANSGLUTAMINASE      | 0.1102234 | -0.521811 | 1.4300706 | 0.1591993 | 0.2052487 | -5.876966 |
| RICTOR                | 0.1136495 | 0.0098561 | 0.6871741 | 0.4952928 | 0.5518977 | -6.65116  |
| JNK_PT183_Y185        | 0.1191739 | 0.2508186 | 1.3411532 | 0.1862072 | 0.2361652 | -5.996607 |
| ASNS                  | 0.1384948 | -0.300165 | 1.4032764 | 0.1669956 | 0.2135353 | -5.913763 |
| PKC-ALPHA_PS657       | 0.1409506 | -0.335752 | 1.6682329 | 0.1018064 | 0.1369121 | -5.522231 |
| SCD1                  | 0.1519082 | 0.1074465 | 1.020328  | 0.312708  | 0.3752496 | -6.368258 |
| LCK                   | 0.1561822 | -0.125685 | 1.8230108 | 0.0745574 | 0.1047833 | -5.265758 |
| FOXO3A                | 0.1670597 | 0.3325876 | 3.1898668 | 0.0025135 | 0.0047842 | -2.232346 |
| PR                    | 0.1777688 | 0.1071539 | 2.4179286 | 0.0194697 | 0.0323115 | -4.103437 |
| C-JUN_PS73            | 0.1855682 | 0.1251588 | 2.4120001 | 0.0197533 | 0.032437  | -4.116316 |
| CHK2_PT68             | 0.1970231 | -0.025798 | 1.5517613 | 0.1273141 | 0.1697521 | -5.701867 |
| YAP_PS127             | 0.2026069 | 0.1780363 | 1.2168743 | 0.2296247 | 0.2842972 | -6.151854 |
| FOXO3A_PS318_S321     | 0.20428   | 0.2315098 | 4.7248418 | 2.06E-05  | 6.66E-05  | 2.3471229 |
| CASPASE-7_CLEAVEDD198 | 0.2569521 | 0.021118  | 1.746647  | 0.0871203 | 0.1202723 | -5.394794 |
| CD31                  | 0.2652862 | 0.1225489 | 4.3707305 | 6.64E-05  | 0.0001851 | 1.2164441 |
| XBP1                  | 0.2874565 | 0.139963  | 3.2732179 | 0.0019795 | 0.0039089 | -2.009453 |
| SMAD4                 | 0.3037187 | 0.2949091 | 5.7078001 | 7.07E-07  | 3.15E-06  | 5.6246857 |
| ACVRL1                | 0.3058088 | 0.3244904 | 5.9084185 | 3.50E-07  | 1.76E-06  | 6.3100998 |
| AKT_PS473             | 0.3194802 | -0.335019 | 1.839694  | 0.0720259 | 0.103083  | -5.236929 |
| FOXM1                 | 0.3243813 | -0.074377 | 3.1326683 | 0.0029556 | 0.0055551 | -2.383156 |
| SRC_PY416             | 0.3249863 | -0.267433 | 3.5303817 | 0.0009296 | 0.0019598 | -1.299597 |
| HER2_PY1248           | 0.3459793 | -0.003999 | 4.218764  | 0.0001088 | 0.000283  | 0.7424084 |
| IRS1                  | 0.3488918 | 0.2464823 | 3.8266509 | 0.0003767 | 0.0008904 | -0.443915 |
| N-RAS                 | 0.3513395 | 0.320786  | 5.7514232 | 6.07E-07  | 2.87E-06  | 5.7733976 |
| NOTCH1                | 0.3548407 | 0.096773  | 6.6901931 | 2.23E-08  | 1.90E-07  | 9.0048844 |
| P27_PT157             | 0.3906463 | 0.217442  | 6.2830432 | 9.39E-08  | 5.63E-07  | 7.5981777 |
| MAPK_PT202_Y204       | 0.3910859 | 0.6767863 | 2.1624279 | 0.0356183 | 0.0539462 | -4.635544 |
| LKB1                  | 0.3959385 | 0.2165387 | 6.0591707 | 2.06E-07  | 1.11E-06  | 6.827366  |
| STAT3_PY705           | 0.4103988 | 0.3748754 | 2.9379822 | 0.0050712 | 0.0091989 | -2.882784 |
| PKC-ALPHA             | 0.4130286 | -0.12789  | 4.4687659 | 4.82E-05  | 0.0001392 | 1.5259995 |
| MRE11                 | 0.4146741 | 0.3597772 | 6.5752764 | 3.35E-08  | 2.50E-07  | 8.6074756 |
| C-RAF_PS338           | 0.4303491 | 0.1087602 | 5.1379922 | 5.07E-06  | 1.93E-05  | 3.7043585 |
| P90RSK_PT359_S363     | 0.4495327 | 0.3153963 | 5.1089408 | 5.60E-06  | 2.03E-05  | 3.6077986 |
| N-CADHERIN            | 0.4538954 | 0.051976  | 7.3874767 | 1.92E-09  | 2.39E-08  | 11.414184 |
| EGFR                  | 0.4686269 | -0.203467 | 7.9339063 | 2.85E-10  | 6.49E-09  | 13.289474 |



|                 |           |           |           |           |           |           |
|-----------------|-----------|-----------|-----------|-----------|-----------|-----------|
| PAI-1           | 0.4883138 | 0.730793  | 3.0044806 | 0.004226  | 0.007756  | -2.714562 |
| BID             | 0.4925879 | 0.1678097 | 7.8718913 | 3.53E-10  | 6.89E-09  | 13.07755  |
| HEREGULIN       | 0.5013426 | 0.203792  | 5.0308075 | 7.32E-06  | 2.59E-05  | 3.3488809 |
| EGFR_PY1068     | 0.5158974 | 0.3243926 | 4.497615  | 4.38E-05  | 0.0001289 | 1.6176228 |
| AKT_PT308       | 0.539483  | -0.415484 | 3.9714607 | 0.0002395 | 0.0005838 | -0.012425 |
| C-KIT           | 0.5410818 | 0.4190207 | 3.7299366 | 0.0005077 | 0.0011479 | -0.727403 |
| RICTOR_PT1135   | 0.5455185 | 0.30136   | 7.4604314 | 1.49E-09  | 2.11E-08  | 11.665474 |
| MEK1            | 0.5600791 | 0.0281061 | 3.7113726 | 0.0005375 | 0.0011978 | -0.781369 |
| RAB11           | 0.5816763 | 0.405032  | 7.4689286 | 1.44E-09  | 2.11E-08  | 11.694726 |
| YB-1_PS102      | 0.583564  | 0.070743  | 8.7038247 | 2.01E-11  | 1.04E-09  | 15.894894 |
| SRC_PY527       | 0.584068  | 0.1150113 | 3.1896845 | 0.0025148 | 0.0047842 | -2.232829 |
| STATHMIN        | 0.5989587 | 0.3951334 | 7.5504296 | 1.08E-09  | 1.88E-08  | 11.97513  |
| P70S6K_PT389    | 0.6650471 | 0.3876134 | 6.1779629 | 1.36E-07  | 7.76E-07  | 7.2360401 |
| MEK1_PS217_S221 | 0.6833646 | 0.5443546 | 6.4257151 | 5.68E-08  | 3.69E-07  | 8.0906111 |
| CAVEOLIN-1      | 0.8098351 | 0.3465618 | 3.2391785 | 0.0021831 | 0.0042571 | -2.100921 |
| MYH11           | 0.857368  | 1.0337437 | 2.3448172 | 0.0232367 | 0.0374826 | -4.260526 |
| HSP70           | 0.9396473 | 0.3579326 | 5.1389429 | 5.06E-06  | 1.93E-05  | 3.7075212 |
| ANNEXIN-1       | 1.2823649 | 0.0587676 | 6.5090662 | 4.23E-08  | 3.00E-07  | 8.3785981 |
| NF-KB-P65_PS536 | 1.3423273 | 0.3392258 | 6.7521581 | 1.80E-08  | 1.65E-07  | 9.2192218 |
| COLLAGEN_VI     | 1.4598908 | 1.2732798 | 6.5740928 | 3.37E-08  | 2.50E-07  | 8.6033833 |
