# Supplementary material
Source: PubMed Central journal article supplement (PMC5103285)
Supplement: NIHMS791706-supplement-3.pdf [file NIHMS791706-supplement-3.pdf]

## ERposIDC\_NormalBreast

| Protein | ID                        | logFC    | t        | P.Value  | adj.P.Val | B        | Classification |
|---------|---------------------------|----------|----------|----------|-----------|----------|----------------|
|         | 1 14-3-3_BETA             | -1.09169 | -7.56952 | 7.03E-05 | 0.00044   | 1.6384   | STROMAL        |
|         | 4 4E-BP1                  | 1.79026  | 12.5756  | 1.71E-06 | 5.50E-05  | 5.6731   | CANCER         |
|         | 5 4E-BP1_PS65             | 1.35213  | 7.77928  | 5.80E-05 | 0.0004    | 1.84869  | CANCER         |
|         | 6 4E-BP1_PT37_T46         | 1.60804  | 9.00801  | 2.03E-05 | 0.0002    | 2.99485  | CANCER         |
|         | 11 ACC1                   | 1.87583  | 4.10111  | 0.00355  | 0.00694   | -2.62216 | CANCER         |
|         | 12 ACETYL-A-TUBULIN-LYS40 | 1.02792  | 2.81864  | 0.02288  | 0.03505   | -4.58826 | CANCER         |
|         | 13 ACVRL1                 | -1.31156 | -9.3489  | 1.55E-05 | 0.00017   | 3.28917  | STROMAL        |
|         | 15 AKT                    | 1.40655  | 5.36807  | 0.00071  | 0.00179   | -0.87856 | CANCER         |
|         | 17 AKT_PT308              | -0.91493 | -3.52368 | 0.00799  | 0.01403   | -3.48862 | STROMAL        |
|         | 21 ANNEXIN-1              | -2.0233  | -8.93347 | 2.15E-05 | 0.0002    | 2.9292   | STROMAL        |
|         | 25 ASNS                   | 2.32739  | 10.8574  | 5.14E-06 | 7.64E-05  | 4.48617  | CANCER         |
|         | 27 B-RAF                  | 1.28281  | 6.66112  | 0.00017  | 0.00074   | 0.67206  | CANCER         |
|         | 29 BAK                    | -0.96129 | -6.10308 | 0.00031  | 0.00097   | 0.02975  | STROMAL        |
|         | 30 BAP1C-4                | 1.35228  | 8.76544  | 2.47E-05 | 0.00022   | 2.77947  | CANCER         |
|         | 35 BETA-CATENIN           | 0.87542  | 3.54614  | 0.00774  | 0.01396   | -3.45422 | CANCER         |
|         | 36 BID                    | -1.2882  | -6.998   | 0.00012  | 0.0006    | 1.04139  | STROMAL        |
|         | 38 BRCA2                  | -0.70188 | -4.63325 | 0.00175  | 0.00388   | -1.86212 | STROMAL        |
|         | 40 C-KIT                  | -2.93705 | -8.05074 | 4.55E-05 | 0.00032   | 2.11419  | STROMAL        |
|         | 41 C-MET_PY1235           | -0.55348 | -3.79688 | 0.00541  | 0.01004   | -3.07372 | STROMAL        |
|         | 43 C-RAF                  | 0.47243  | 3.5726   | 0.00745  | 0.01356   | -3.41374 | CANCER         |
|         | 45 CASPASE-7_CLEAVEDD198  | -1.6022  | -7.27133 | 9.31E-05 | 0.0005    | 1.33141  | STROMAL        |
|         | 46 CAVEOLIN-1             | -5.91176 | -11.4343 | 3.50E-06 | 6.13E-05  | 4.90364  | STROMAL        |
|         | 47 CD20                   | -1.00056 | -4.52108 | 0.00202  | 0.00429   | -2.01904 | STROMAL        |
|         | 51 CHK1                   | 1.64087  | 6.05204  | 0.00032  | 0.00099   | -0.03097 | CANCER         |
|         | 52 CHK1_PS345             | 0.71239  | 5.45049  | 0.00064  | 0.00165   | -0.77302 | CANCER         |
|         | 53 CHK2                   | 1.72712  | 7.59819  | 6.84E-05 | 0.00044   | 1.66741  | CANCER         |
|         | 55 CIAP                   | 0.64484  | 4.53451  | 0.00199  | 0.00426   | -2.00016 | CANCER         |
|         | 56 CLAUDIN-7              | 1.41528  | 4.0976   | 0.00356  | 0.00694   | -2.6273  | CANCER         |
|         | 57 COLLAGEN_VI            | -3.50636 | -12.0128 | 2.41E-06 | 5.83E-05  | 5.30251  | STROMAL        |
|         | 58 CYCLIN_B1              | 3.46392  | 12.6877  | 1.60E-06 | 5.50E-05  | 5.74494  | CANCER         |
|         | 59 CYCLIN_D1              | -1.37406 | -5.79604 | 0.00043  | 0.00123   | -0.34077 | STROMAL        |
|         | 60 CYCLIN_E1              | 1.11076  | 7.04043  | 0.00012  | 0.00059   | 1.08696  | CANCER         |
|         | 62 DJ-1                   | -0.50449 | -3.40224 | 0.00954  | 0.01603   | -3.67554 | STROMAL        |
|         | 63 DVL3                   | 0.82043  | 3.52796  | 0.00795  | 0.01403   | -3.48206 | CANCER         |
|         | 64 E-CADHERIN             | 1.11025  | 3.12472  | 0.0144   | 0.02282   | -4.1073  | CANCER         |
|         | 65 EEF2                   | 1.33564  | 8.43908  | 3.25E-05 | 0.00025   | 2.48154  | CANCER         |
|         | 66 EEF2K                  | 1.31108  | 4.24595  | 0.00291  | 0.0058    | -2.41142 | CANCER         |
|         | 67 EGFR                   | -0.7511  | -4.45022 | 0.00222  | 0.00461   | -2.11908 | STROMAL        |
|         | 69 EGFR_PY1173            | -1.10222 | -6.72611 | 0.00016  | 0.00072   | 0.74436  | STROMAL        |
|         | 70 EIF4E                  | 0.63743  | 4.08995  | 0.0036   | 0.00695   | -2.63851 | CANCER         |
|         | 71 EIF4G                  | 2.71906  | 16.9153  | 1.79E-07 | 1.72E-05  | 8.06643  | CANCER         |
|         | 72 ER-ALPHA               | 1.92977  | 4.75301  | 0.0015   | 0.0034    | -1.69656 | CANCER         |
|         | 73 ER-ALPHA_PS118         | 0.89187  | 4.83241  | 0.00136  | 0.00312   | -1.58792 | CANCER         |
|         | 74 ERCC1                  | 1.19449  | 6.20509  | 0.00027  | 0.0009    | 0.15012  | CANCER         |

|                            |          |          |          |          |          |         |
|----------------------------|----------|----------|----------|----------|----------|---------|
| 76 ETS-1                   | -1.1324  | -5.86463 | 0.0004   | 0.00117  | -0.25691 | STROMAL |
| 77 FASN                    | 1.94766  | 5.89419  | 0.00039  | 0.00115  | -0.22097 | CANCER  |
| 78 FIBRONECTIN             | -5.2744  | -33.3437 | 9.12E-10 | 1.76E-07 | 13.1727  | STROMAL |
| 79 FOXM1                   | 1.39614  | 5.1089   | 0.00096  | 0.00231  | -1.21667 | CANCER  |
| 80 FOXO3A                  | -0.53899 | -4.01991 | 0.00396  | 0.00757  | -2.74152 | STROMAL |
| 81 FOXO3A_PS318_S321       | -1.01127 | -6.54572 | 0.00019  | 0.00075  | 0.54243  | STROMAL |
| 82 G6PD                    | 0.71021  | 2.67049  | 0.02872  | 0.04232  | -4.82154 | CANCER  |
| 83 GAB2                    | 1.36929  | 7.06761  | 0.00011  | 0.00059  | 1.11605  | CANCER  |
| 84 GAPDH                   | 1.41926  | 3.00588  | 0.01722  | 0.02701  | -4.29366 | CANCER  |
| 85 GATA3                   | 4.57518  | 7.27853  | 9.24E-05 | 0.0005   | 1.33894  | CANCER  |
| 88 GSK3_PS9                | 2.56329  | 9.18051  | 1.77E-05 | 0.00018  | 3.14497  | CANCER  |
| 86 GSK3-ALPHA-BETA         | 1.03472  | 6.46517  | 0.00021  | 0.00079  | 0.45097  | CANCER  |
| 87 GSK3-ALPHA-BETA_PS21_S9 | 1.59679  | 11.6592  | 3.02E-06 | 6.13E-05 | 5.06094  | CANCER  |
| 89 HER2                    | 1.31382  | 8.47569  | 3.15E-05 | 0.00025  | 2.51544  | CANCER  |
| 91 HER3                    | 1.6701   | 10.7249  | 5.63E-06 | 7.77E-05 | 4.38738  | CANCER  |
| 92 HER3_PY1289             | -0.48042 | -3.50197 | 0.00825  | 0.01435  | -3.52194 | STROMAL |
| 94 HSP70                   | -2.20556 | -6.76815 | 0.00015  | 0.00072  | 0.79086  | STROMAL |
| 96 INPP4B                  | 0.83379  | 5.21177  | 0.00085  | 0.00211  | -1.08134 | CANCER  |
| 98 JNK_PT183_PY185         | -0.47666 | -3.40026 | 0.00957  | 0.01603  | -3.6786  | STROMAL |
| 99 JNK2                    | 0.50229  | 3.53021  | 0.00792  | 0.01403  | -3.47862 | CANCER  |
| 100 KU80                   | 1.13876  | 5.45099  | 0.00064  | 0.00165  | -0.77239 | CANCER  |
| 101 LCK                    | -1.51541 | -9.45361 | 1.43E-05 | 0.00016  | 3.37768  | STROMAL |
| 102 LKB1                   | -0.80324 | -6.57019 | 0.00019  | 0.00075  | 0.57005  | STROMAL |
| 105 MEK1_PS217_S221        | -0.92196 | -6.30763 | 0.00025  | 0.00085  | 0.26976  | STROMAL |
| 107 MRE11                  | -1.06879 | -6.35033 | 0.00024  | 0.00084  | 0.31918  | STROMAL |
| 108 MSH2                   | 1.71997  | 12.66    | 1.63E-06 | 5.50E-05 | 5.72727  | CANCER  |
| 109 MSH6                   | 2.26107  | 11.4784  | 3.40E-06 | 6.13E-05 | 4.93468  | CANCER  |
| 110 MTOR                   | 1.45618  | 7.5905   | 6.89E-05 | 0.00044  | 1.65964  | CANCER  |
| 111 MTOR_PS2448            | 1.09301  | 8.20105  | 3.99E-05 | 0.0003   | 2.25808  | CANCER  |
| 112 MYH11                  | -5.4787  | -7.33325 | 8.77E-05 | 0.0005   | 1.39595  | STROMAL |
| 114 N-CADHERIN             | -1.77749 | -11.2714 | 3.89E-06 | 6.26E-05 | 4.78782  | STROMAL |
| 115 N-RAS                  | -0.89904 | -5.74868 | 0.00045  | 0.00127  | -0.39905 | STROMAL |
| 116 NDRG1_PT346            | -1.39527 | -3.94168 | 0.00442  | 0.00836  | -2.85734 | STROMAL |
| 117 NF-KB-P65_PS536        | -1.19556 | -6.22389 | 0.00027  | 0.0009   | 0.17215  | STROMAL |
| 119 NOTCH1                 | 0.60267  | 3.63452  | 0.00681  | 0.01253  | -3.31931 | CANCER  |
| 120 P-CADHERIN             | -0.80197 | -5.09461 | 0.00098  | 0.00231  | -1.23559 | STROMAL |
| 121 P21                    | -1.31436 | -2.8049  | 0.02337  | 0.03552  | -4.60991 | STROMAL |
| 122 P27                    | -0.77799 | -5.1257  | 0.00094  | 0.00231  | -1.19446 | STROMAL |
| 123 P27_PT157              | -0.44401 | -2.76555 | 0.02482  | 0.03743  | -4.67188 | STROMAL |
| 124 P27_PT198              | -0.85803 | -2.93707 | 0.01911  | 0.0295   | -4.40183 | STROMAL |
| 125 P38                    | 0.99015  | 6.33128  | 0.00024  | 0.00084  | 0.29715  | CANCER  |
| 126 P38_PT180_Y182         | -0.94103 | -6.3331  | 0.00024  | 0.00084  | 0.29927  | STROMAL |
| 128 P62-LCK-LIGAND         | 1.38968  | 6.22427  | 0.00027  | 0.0009   | 0.1726   | CANCER  |
| 129 P70S6K                 | 3.16859  | 5.53041  | 0.00058  | 0.00156  | -0.67158 | CANCER  |
| 130 P70S6K_PT389           | 2.00708  | 5.67863  | 0.00049  | 0.00136  | -0.48581 | CANCER  |
| 131 P90RSK                 | 0.69205  | 4.60008  | 0.00183  | 0.00396  | -1.90834 | CANCER  |

|                         |          |          |          |          |          |         |
|-------------------------|----------|----------|----------|----------|----------|---------|
| 132 P9ORSK_PT359_S363   | -0.8642  | -4.3246  | 0.00262  | 0.00527  | -2.29817 | STROMAL |
| 133 PAI-1               | -0.98499 | -6.51838 | 0.0002   | 0.00076  | 0.51147  | STROMAL |
| 134 PAXILLIN            | 1.07854  | 4.39862  | 0.00238  | 0.00488  | -2.19237 | CANCER  |
| 135 PCNA                | 0.91834  | 5.65785  | 0.0005   | 0.00137  | -0.51167 | CANCER  |
| 136 PDCD4               | 1.29042  | 4.85831  | 0.00131  | 0.00306  | -1.55269 | CANCER  |
| 137 PDK1                | 0.54534  | 4.36253  | 0.00249  | 0.00506  | -2.24386 | CANCER  |
| 138 PDK1_PS241          | 1.3609   | 7.35389  | 8.60E-05 | 0.0005   | 1.41737  | CANCER  |
| 139 PEA15               | -0.55019 | -3.39558 | 0.00964  | 0.01603  | -3.68582 | STROMAL |
| 141 PI3K-P110-ALPHA     | 0.4164   | 3.12334  | 0.01443  | 0.02282  | -4.10945 | CANCER  |
| 143 PKC-ALPHA           | -0.49021 | -3.48836 | 0.00842  | 0.0145   | -3.54285 | STROMAL |
| 144 PKC-ALPHA_PS657     | -1.44588 | -7.29317 | 9.12E-05 | 0.0005   | 1.35421  | STROMAL |
| 145 PKC-DELTA_PS664     | -0.49633 | -3.90762 | 0.00463  | 0.00868  | -2.90801 | STROMAL |
| 148 PRAS40_PT246        | 0.82649  | 6.62307  | 0.00018  | 0.00074  | 0.6295   | CANCER  |
| 150 PREX1               | 2.53464  | 6.62031  | 0.00018  | 0.00074  | 0.6264   | CANCER  |
| 151 PTEN                | 1.87585  | 5.09723  | 0.00098  | 0.00231  | -1.23212 | CANCER  |
| 152 RAB11               | -1.63647 | -6.16172 | 0.00029  | 0.00093  | 0.09911  | STROMAL |
| 153 RAB25               | 0.97799  | 5.46963  | 0.00063  | 0.00165  | -0.74864 | CANCER  |
| 155 RAD51               | -2.54416 | -12.09   | 2.30E-06 | 5.83E-05 | 5.35434  | STROMAL |
| 158 RB_PS807_S811       | 3.29392  | 14.1738  | 6.91E-07 | 4.44E-05 | 6.64175  | CANCER  |
| 157 RB-M-QC_GBL11066224 | -0.61382 | -3.31456 | 0.01086  | 0.01791  | -3.81132 | STROMAL |
| 159 RBM15               | 3.13001  | 8.52409  | 3.02E-05 | 0.00025  | 2.56007  | CANCER  |
| 162 S6                  | 1.9411   | 10.141   | 8.53E-06 | 0.00011  | 3.93797  | CANCER  |
| 163 S6_PS235_S236       | 1.8559   | 6.44307  | 0.00021  | 0.00079  | 0.42573  | CANCER  |
| 164 S6_PS240_S244       | 1.7321   | 5.94094  | 0.00037  | 0.0011   | -0.16436 | CANCER  |
| 165 SCD1                | 0.44646  | 3.46838  | 0.00866  | 0.0148   | -3.57356 | CANCER  |
| 167 SHC_PY317           | 0.52766  | 3.15713  | 0.01372  | 0.02206  | -4.05659 | CANCER  |
| 169 SMAD3               | -0.42824 | -3.21594 | 0.01256  | 0.02055  | -3.96477 | STROMAL |
| 170 SMAD4               | -0.57102 | -4.47401 | 0.00215  | 0.00451  | -2.08542 | STROMAL |
| 173 SRC_PY527           | 0.52674  | 2.69344  | 0.02773  | 0.04116  | -4.78542 | CANCER  |
| 174 STAT3_PY705         | -1.77577 | -6.06025 | 0.00032  | 0.00099  | -0.02118 | STROMAL |
| 175 STAT5-ALPHA         | -1.09048 | -2.99332 | 0.01755  | 0.02731  | -4.31339 | STROMAL |
| 176 STATHMIN            | -1.04256 | -5.79025 | 0.00043  | 0.00123  | -0.34789 | STROMAL |
| 178 TAZ                 | -0.96927 | -6.5982  | 0.00018  | 0.00075  | 0.60158  | STROMAL |
| 181 TFRC                | 3.59864  | 9.51112  | 1.37E-05 | 0.00016  | 3.42593  | CANCER  |
| 179 TIGAR               | -1.07943 | -5.35608 | 0.00072  | 0.00179  | -0.89399 | STROMAL |
| 180 TRANSGLUTAMINASE    | -0.37826 | -2.74883 | 0.02547  | 0.0381   | -4.69821 | STROMAL |
| 184 TUBERIN             | 1.20627  | 6.9428   | 0.00013  | 0.00062  | 0.98178  | CANCER  |
| 185 TUBERIN_PT1462      | -0.66115 | -4.60006 | 0.00183  | 0.00396  | -1.90836 | STROMAL |
| 187 VHL                 | 2.75224  | 6.72589  | 0.00016  | 0.00072  | 0.74412  | CANCER  |
| 190 YAP                 | -0.73174 | -3.19749 | 0.01291  | 0.02094  | -3.99355 | STROMAL |
| 193 YB-1_PS102          | -0.69346 | -4.74471 | 0.00152  | 0.0034   | -1.70796 | STROMAL |

ILC\_NormalBreast

| Protein | ID                       | logFC    | t        | P.Value  | adj.P.Val | B        | Classification |
|---------|--------------------------|----------|----------|----------|-----------|----------|----------------|
|         | 1 14-3-3_BETA            | -0.91187 | -6.07447 | 0.00032  | 0.00152   | 0.16615  | STROMAL        |
|         | 4 4E-BP1                 | 3.60293  | 11.1911  | 4.28E-06 | 9.02E-05  | 4.82874  | CANCER         |
|         | 5 4E-BP1_PS65            | 3.52475  | 13.9447  | 8.22E-07 | 3.17E-05  | 6.5617   | CANCER         |
|         | 6 4E-BP1_PT37_T46        | 3.26548  | 10.9167  | 5.14E-06 | 9.02E-05  | 4.63302  | CANCER         |
|         | 7 4E-BP1_PT70            | 1.6014   | 4.84121  | 0.00136  | 0.00452   | -1.39175 | CANCER         |
|         | 8 53BP1                  | 2.38396  | 4.32176  | 0.00266  | 0.00695   | -2.11278 | CANCER         |
|         | 11 ACC1                  | 1.32079  | 3.4953   | 0.0084   | 0.01725   | -3.3352  | CANCER         |
|         | 13 ACVRL1                | -1.11338 | -7.41832 | 8.32E-05 | 0.00064   | 1.63756  | STROMAL        |
|         | 16 AKT_PS473             | -1.53366 | -6.07951 | 0.00032  | 0.00152   | 0.17208  | STROMAL        |
|         | 17 AKT_PT308             | -1.6965  | -9.70654 | 1.22E-05 | 0.00016   | 3.70956  | STROMAL        |
|         | 18 ALPHA-CATENIN         | -2.01661 | -3.70033 | 0.00626  | 0.01342   | -3.02418 | STROMAL        |
|         | 20 AMPK_PT172            | -0.92692 | -4.26649 | 0.00287  | 0.00728   | -2.19177 | STROMAL        |
|         | 21 ANNEXIN-1             | -1.81409 | -7.67539 | 6.56E-05 | 0.00053   | 1.89536  | STROMAL        |
|         | 23 AR                    | 0.9907   | 3.28877  | 0.01136  | 0.02149   | -3.65274 | CANCER         |
|         | 25 ASNS                  | 1.37864  | 6.68588  | 0.00017  | 0.00094   | 0.86263  | CANCER         |
|         | 27 B-RAF                 | 1.44317  | 6.61303  | 0.00018  | 0.00098   | 0.78211  | CANCER         |
|         | 29 BAK                   | -0.6058  | -3.21722 | 0.01263  | 0.02346   | -3.76358 | STROMAL        |
|         | 30 BAP1C-4               | 1.78729  | 9.65634  | 1.27E-05 | 0.00016   | 3.66897  | CANCER         |
|         | 35 BETA-CATENIN          | -2.86846 | -12.0326 | 2.49E-06 | 6.58E-05  | 5.40074  | STROMAL        |
|         | 36 BID                   | -1.0539  | -5.04787 | 0.00106  | 0.0037    | -1.11569 | STROMAL        |
|         | 37 BIM                   | 0.78386  | 2.95327  | 0.01875  | 0.03351   | -4.1752  | CANCER         |
|         | 40 C-KIT                 | -2.85668 | -7.75181 | 6.11E-05 | 0.00051   | 1.97065  | STROMAL        |
|         | 45 CASPASE-7_CLEAVEDD198 | -1.12341 | -4.6074  | 0.00183  | 0.00544   | -1.71151 | STROMAL        |
|         | 46 CAVEOLIN-1            | -6.1641  | -11.887  | 2.73E-06 | 6.58E-05  | 5.30469  | STROMAL        |
|         | 47 CD20                  | -0.83747 | -3.91713 | 0.00462  | 0.01053   | -2.70056 | STROMAL        |
|         | 51 CHK1                  | 1.32318  | 6.58508  | 0.00019  | 0.00098   | 0.75104  | CANCER         |
|         | 52 CHK1_PS345            | 0.80895  | 5.58536  | 0.00056  | 0.00224   | -0.4263  | CANCER         |
|         | 53 CHK2                  | 1.67481  | 6.68268  | 0.00017  | 0.00094   | 0.85911  | CANCER         |
|         | 57 COLLAGEN_VI           | -1.44258 | -4.83042 | 0.00138  | 0.00452   | -1.40633 | STROMAL        |
|         | 58 CYCLIN_B1             | 3.79998  | 21.4542  | 3.04E-08 | 5.86E-06  | 9.84428  | CANCER         |
|         | 59 CYCLIN_D1             | -0.94793 | -3.33233 | 0.01065  | 0.02036   | -3.58546 | STROMAL        |
|         | 60 CYCLIN_E1             | 1.17409  | 7.20439  | 0.0001   | 0.00073   | 1.41756  | CANCER         |
|         | 64 E-CADHERIN            | -3.496   | -9.87905 | 1.07E-05 | 0.00016   | 3.84761  | STROMAL        |
|         | 65 EEF2                  | 0.73123  | 4.40577  | 0.00238  | 0.00648   | -1.99356 | CANCER         |
|         | 66 EEF2K                 | 0.8592   | 2.89694  | 0.02042  | 0.03583   | -4.26344 | CANCER         |
|         | 67 EGFR                  | -0.97975 | -5.23598 | 0.00084  | 0.00312   | -0.86974 | STROMAL        |
|         | 68 EGFR_PY1068           | -0.70139 | -3.80577 | 0.00539  | 0.01183   | -2.86608 | STROMAL        |
|         | 69 EGFR_PY1173           | -0.7889  | -4.58678 | 0.00188  | 0.00551   | -1.74009 | STROMAL        |
|         | 70 EIF4E                 | 0.43702  | 2.65502  | 0.02955  | 0.04959   | -4.64274 | CANCER         |
|         | 71 EIF4G                 | 1.55985  | 6.2309   | 0.00027  | 0.00135   | 0.34888  | CANCER         |
|         | 72 ER-ALPHA              | 3.84844  | 15.9863  | 2.91E-07 | 1.87E-05  | 7.62677  | CANCER         |
|         | 73 ER-ALPHA_PS118        | 1.96499  | 4.2937   | 0.00277  | 0.00712   | -2.15283 | CANCER         |
|         | 74 ERCC1                 | 1.24498  | 5.86841  | 0.00041  | 0.0017    | -0.07951 | CANCER         |
|         | 76 ETS-1                 | -0.8699  | -4.07441 | 0.00372  | 0.00914   | -2.46948 | STROMAL        |

|     |                         |          |          |          |          |          |         |
|-----|-------------------------|----------|----------|----------|----------|----------|---------|
| 78  | FIBRONECTIN             | -4.55799 | -18.1924 | 1.08E-07 | 1.04E-05 | 8.61722  | STROMAL |
| 79  | FOXM1                   | 2.18515  | 7.85588  | 5.57E-05 | 0.00049  | 2.0722   | CANCER  |
| 81  | FOXO3A_PS318_S321       | -0.73642 | -4.46881 | 0.00219  | 0.00605  | -1.90475 | STROMAL |
| 83  | GAB2                    | 1.93566  | 6.74744  | 0.00016  | 0.00093  | 0.93018  | CANCER  |
| 85  | GATA3                   | 5.40897  | 8.24421  | 3.96E-05 | 0.00038  | 2.44156  | CANCER  |
| 88  | GSK3_PS9                | 1.94285  | 7.14637  | 0.00011  | 0.00074  | 1.35702  | CANCER  |
| 86  | GSK3-ALPHA-BETA         | 0.75991  | 4.475    | 0.00218  | 0.00605  | -1.89607 | CANCER  |
| 87  | GSK3-ALPHA-BETA_PS21_S9 | 1.01498  | 5.1999   | 0.00088  | 0.0032   | -0.91652 | CANCER  |
| 91  | HER3                    | 1.71148  | 10.9459  | 5.04E-06 | 9.02E-05 | 4.65411  | CANCER  |
| 94  | HSP70                   | -1.91156 | -5.95768 | 0.00037  | 0.00161  | 0.02761  | STROMAL |
| 95  | IGFBP2                  | 1.46041  | 3.21638  | 0.01264  | 0.02346  | -3.76488 | CANCER  |
| 99  | JNK2                    | 0.78844  | 4.36544  | 0.00251  | 0.00665  | -2.05067 | CANCER  |
| 100 | KU80                    | 1.50811  | 7.23754  | 9.87E-05 | 0.00073  | 1.45199  | CANCER  |
| 101 | LCK                     | -1.70393 | -9.37417 | 1.57E-05 | 0.00019  | 3.43713  | STROMAL |
| 102 | LKB1                    | -0.71457 | -4.61776 | 0.00181  | 0.00544  | -1.69718 | STROMAL |
| 103 | MAPK_PT202_Y204         | -0.76652 | -3.11836 | 0.01463  | 0.02689  | -3.91731 | STROMAL |
| 105 | MEK1_PS217_S221         | -0.62125 | -3.91397 | 0.00464  | 0.01053  | -2.70524 | STROMAL |
| 106 | MIG-6                   | 0.45561  | 2.69664  | 0.02772  | 0.04777  | -4.57752 | CANCER  |
| 107 | MRE11                   | -0.8512  | -4.77463 | 0.00148  | 0.00475  | -1.48199 | STROMAL |
| 108 | MSH2                    | 2.05108  | 9.04981  | 2.03E-05 | 0.00023  | 3.16268  | CANCER  |
| 109 | MSH6                    | 2.16988  | 6.98835  | 0.00013  | 0.00081  | 1.19016  | CANCER  |
| 110 | MTOR                    | 1.34553  | 6.89591  | 0.00014  | 0.00086  | 1.09122  | CANCER  |
| 111 | MTOR_PS2448             | 1.11269  | 8.46873  | 3.27E-05 | 0.00033  | 2.64847  | CANCER  |
| 112 | MYH11                   | -5.29234 | -7.04293 | 0.00012  | 0.00079  | 1.24812  | STROMAL |
| 113 | MYOSIN-IIA-PS1943       | -1.09523 | -3.91997 | 0.0046   | 0.01053  | -2.69636 | STROMAL |
| 114 | N-CADHERIN              | -1.45074 | -8.8865  | 2.31E-05 | 0.00025  | 3.02116  | STROMAL |
| 115 | N-RAS                   | -0.78331 | -4.76341 | 0.0015   | 0.00475  | -1.49727 | STROMAL |
| 116 | NDRG1_PT346             | -1.21441 | -3.37882 | 0.00995  | 0.01947  | -3.51382 | STROMAL |
| 117 | NF-KB-P65_PS536         | -1.5384  | -4.6285  | 0.00178  | 0.00544  | -1.68232 | STROMAL |
| 120 | P-CADHERIN              | -0.77017 | -4.55124 | 0.00197  | 0.00568  | -1.78948 | STROMAL |
| 122 | P27                     | -0.43729 | -2.66839 | 0.02895  | 0.04901  | -4.62179 | STROMAL |
| 128 | P62-LCK-LIGAND          | 2.00894  | 4.53595  | 0.00201  | 0.00571  | -1.81079 | CANCER  |
| 129 | P70S6K                  | 0.9877   | 4.00157  | 0.00411  | 0.00973  | -2.5761  | CANCER  |
| 130 | P70S6K_PT389            | 1.15015  | 6.54017  | 0.0002   | 0.001    | 0.70092  | CANCER  |
| 131 | P90RSK                  | 0.46065  | 2.81517  | 0.02313  | 0.04021  | -4.39163 | CANCER  |
| 132 | P90RSK_PT359_S363       | -0.7566  | -3.8667  | 0.00495  | 0.01112  | -2.77533 | STROMAL |
| 133 | PAI-1                   | -0.87986 | -5.4773  | 0.00063  | 0.00249  | -0.56162 | STROMAL |
| 135 | PCNA                    | 0.82619  | 5.00298  | 0.00111  | 0.00384  | -1.17512 | CANCER  |
| 137 | PDK1                    | 0.41593  | 2.90446  | 0.02019  | 0.03575  | -4.25166 | CANCER  |
| 138 | PDK1_PS241              | 0.9515   | 4.7051   | 0.00162  | 0.00504  | -1.57694 | CANCER  |
| 139 | PEA15                   | -0.66476 | -3.45739 | 0.00887  | 0.01784  | -3.39321 | STROMAL |
| 142 | PI3K-P85                | -0.5855  | -3.11047 | 0.0148   | 0.02695  | -3.9296  | STROMAL |
| 144 | PKC-ALPHA_PS657         | -2.01087 | -9.75148 | 1.18E-05 | 0.00016  | 3.74575  | STROMAL |
| 147 | PR                      | -0.54386 | -3.75128 | 0.00582  | 0.01263  | -2.94762 | STROMAL |
| 148 | PRAS40_PT246            | 0.69515  | 4.2333   | 0.003    | 0.00752  | -2.23939 | CANCER  |
| 150 | PREX1                   | 0.96731  | 3.37645  | 0.00999  | 0.01947  | -3.51747 | CANCER  |

|                    |          |          |          |          |          |         |
|--------------------|----------|----------|----------|----------|----------|---------|
| 151 PTEN           | 1.36044  | 3.4849   | 0.00853  | 0.01732  | -3.35111 | CANCER  |
| 152 RAB11          | -1.62018 | -5.75422 | 0.00046  | 0.00189  | -0.21808 | STROMAL |
| 153 RAB25          | 0.63353  | 3.34241  | 0.0105   | 0.02026  | -3.5699  | CANCER  |
| 155 RAD51          | -2.7111  | -12.4295 | 1.95E-06 | 6.29E-05 | 5.65667  | STROMAL |
| 158 RB_PS807_S811  | 3.28163  | 14.0915  | 7.59E-07 | 3.17E-05 | 6.64377  | CANCER  |
| 159 RBM15          | 3.55183  | 6.78755  | 0.00015  | 0.00092  | 0.97394  | CANCER  |
| 162 S6             | 1.58293  | 8.19205  | 4.14E-05 | 0.00038  | 2.3928   | CANCER  |
| 163 S6_PS235_S236  | 2.16588  | 5.9642   | 0.00036  | 0.00161  | 0.0354   | CANCER  |
| 164 S6_PS240_S244  | 1.89698  | 5.92874  | 0.00038  | 0.00162  | -0.007   | CANCER  |
| 165 SCD1           | 0.50352  | 3.6085   | 0.00714  | 0.01481  | -3.16292 | CANCER  |
| 168 SMAD1          | 0.51044  | 3.8167   | 0.00531  | 0.01178  | -2.84977 | CANCER  |
| 170 SMAD4          | -0.40477 | -3.04284 | 0.01638  | 0.02955  | -4.03513 | STROMAL |
| 173 SRC_PY527      | -1.24814 | -2.64082 | 0.0302   | 0.05025  | -4.66497 | STROMAL |
| 174 STAT3_PY705    | -1.31257 | -3.99711 | 0.00413  | 0.00973  | -2.58265 | STROMAL |
| 175 STAT5-ALPHA    | -1.26603 | -3.41057 | 0.0095   | 0.0189   | -3.46501 | STROMAL |
| 176 STATHMIN       | -0.72114 | -3.69289 | 0.00633  | 0.01342  | -3.03539 | STROMAL |
| 178 TAZ            | -0.84026 | -5.35205 | 0.00073  | 0.00283  | -0.72051 | STROMAL |
| 181 TFRC           | 1.97929  | 4.00001  | 0.00412  | 0.00973  | -2.5784  | CANCER  |
| 179 TIGAR          | -1.08349 | -5.12776 | 0.00096  | 0.00342  | -1.01061 | STROMAL |
| 182 TSC1           | -0.84203 | -6.01658 | 0.00034  | 0.00158  | 0.09771  | STROMAL |
| 184 TUBERIN        | 0.9283   | 5.28203  | 0.0008   | 0.00301  | -0.8103  | CANCER  |
| 185 TUBERIN_PT1462 | -0.60402 | -4.07017 | 0.00374  | 0.00914  | -2.47567 | STROMAL |
| 186 VEGFR2         | 1.65155  | 3.65001  | 0.00673  | 0.01411  | -3.10009 | CANCER  |
| 188 XBP1           | -0.73822 | -2.6737  | 0.02871  | 0.04901  | -4.61347 | STROMAL |
| 190 YAP            | -0.7931  | -4.89386 | 0.00128  | 0.00432  | -1.32082 | STROMAL |
| 191 YAP_PS127      | -2.36621 | -4.39338 | 0.00242  | 0.0065   | -2.01109 | STROMAL |

Common

| <b>Protein ID</b>          | <b>Classification</b> |
|----------------------------|-----------------------|
| 4 4E-BP1                   | CANCER                |
| 5 4E-BP1_PS65              | CANCER                |
| 6 4E-BP1_PT37_T46          | CANCER                |
| 11 ACC1                    | CANCER                |
| 25 ASNS                    | CANCER                |
| 27 B-RAF                   | CANCER                |
| 30 BAP1C-4                 | CANCER                |
| 51 CHK1                    | CANCER                |
| 52 CHK1_PS345              | CANCER                |
| 53 CHK2                    | CANCER                |
| 58 CYCLIN_B1               | CANCER                |
| 60 CYCLIN_E1               | CANCER                |
| 65 EEF2                    | CANCER                |
| 66 EEF2K                   | CANCER                |
| 70 EIF4E                   | CANCER                |
| 71 EIF4G                   | CANCER                |
| 72 ER-ALPHA                | CANCER                |
| 73 ER-ALPHA_PS118          | CANCER                |
| 74 ERCC1                   | CANCER                |
| 79 FOXM1                   | CANCER                |
| 83 GAB2                    | CANCER                |
| 85 GATA3                   | CANCER                |
| 88 GSK3_PS9                | CANCER                |
| 86 GSK3-ALPHA-BETA         | CANCER                |
| 87 GSK3-ALPHA-BETA_PS21_S9 | CANCER                |
| 91 HER3                    | CANCER                |
| 99 JNK2                    | CANCER                |
| 100 KU80                   | CANCER                |
| 108 MSH2                   | CANCER                |
| 109 MSH6                   | CANCER                |
| 110 MTOR                   | CANCER                |
| 111 MTOR_PS2448            | CANCER                |
| 128 P62-LCK-LIGAND         | CANCER                |
| 129 P70S6K                 | CANCER                |
| 130 P70S6K_PT389           | CANCER                |
| 131 P90RSK                 | CANCER                |
| 135 PCNA                   | CANCER                |
| 137 PDK1                   | CANCER                |
| 138 PDK1_PS241             | CANCER                |
| 148 PRAS40_PT246           | CANCER                |

|     |                       |         |
|-----|-----------------------|---------|
| 150 | PREX1                 | CANCER  |
| 151 | PTEN                  | CANCER  |
| 153 | RAB25                 | CANCER  |
| 158 | RB_PS807_S811         | CANCER  |
| 159 | RBM15                 | CANCER  |
| 162 | S6                    | CANCER  |
| 163 | S6_PS235_S236         | CANCER  |
| 164 | S6_PS240_S244         | CANCER  |
| 165 | SCD1                  | CANCER  |
| 181 | TFRC                  | CANCER  |
| 184 | TUBERIN               | CANCER  |
| 1   | 14-3-3_BETA           | STROMAL |
| 13  | ACVRL1                | STROMAL |
| 17  | AKT_PT308             | STROMAL |
| 21  | ANNEXIN-1             | STROMAL |
| 29  | BAK                   | STROMAL |
| 36  | BID                   | STROMAL |
| 40  | C-KIT                 | STROMAL |
| 45  | CASPASE-7_CLEAVEDD198 | STROMAL |
| 46  | CAVEOLIN-1            | STROMAL |
| 47  | CD20                  | STROMAL |
| 57  | COLLAGEN_VI           | STROMAL |
| 59  | CYCLIN_D1             | STROMAL |
| 67  | EGFR                  | STROMAL |
| 69  | EGFR_PY1173           | STROMAL |
| 76  | ETS-1                 | STROMAL |
| 78  | FIBRONECTIN           | STROMAL |
| 81  | FOXO3A_PS318_S321     | STROMAL |
| 94  | HSP70                 | STROMAL |
| 101 | LCK                   | STROMAL |
| 102 | LKB1                  | STROMAL |
| 105 | MEK1_PS217_S221       | STROMAL |
| 107 | MRE11                 | STROMAL |
| 112 | MYH11                 | STROMAL |
| 114 | N-CADHERIN            | STROMAL |
| 115 | N-RAS                 | STROMAL |
| 116 | NDRG1_PT346           | STROMAL |
| 117 | NF-KB-P65_PS536       | STROMAL |
| 120 | P-CADHERIN            | STROMAL |
| 122 | P27                   | STROMAL |
| 132 | P90RSK_PT359_S363     | STROMAL |
| 133 | PAI-1                 | STROMAL |



|                     |         |
|---------------------|---------|
| 139 PEA15           | STROMAL |
| 144 PKC-ALPHA_PS657 | STROMAL |
| 152 RAB11           | STROMAL |
| 155 RAD51           | STROMAL |
| 170 SMAD4           | STROMAL |
| 174 STAT3_PY705     | STROMAL |
| 175 STAT5-ALPHA     | STROMAL |
| 176 STATHMIN        | STROMAL |
| 178 TAZ             | STROMAL |
| 179 TIGAR           | STROMAL |
| 185 TUBERIN_PT1462  | STROMAL |
| 190 YAP             | STROMAL |

Different

| Protein | ID                        | IDC     | ILC     |
|---------|---------------------------|---------|---------|
|         | 7 4E-BP1_PT70             |         | CANCER  |
|         | 8 53BP1                   |         | CANCER  |
|         | 12 ACETYL-A-TUBULIN-LYS40 | CANCER  |         |
|         | 15 AKT                    | CANCER  |         |
|         | 16 AKT_PS473              |         | STROMAL |
|         | 18 ALPHA-CATENIN          |         | STROMAL |
|         | 20 AMPK_PT172             |         | STROMAL |
|         | 23 AR                     |         | CANCER  |
|         | 35 BETA-CATENIN           | CANCER  | STROMAL |
|         | 37 BIM                    |         | CANCER  |
|         | 38 BRCA2                  | STROMAL |         |
|         | 41 C-MET_PY1235           | STROMAL |         |
|         | 43 C-RAF                  | CANCER  |         |
|         | 55 CIAP                   | CANCER  |         |
|         | 56 CLAUDIN-7              | CANCER  |         |
|         | 62 DJ-1                   | STROMAL |         |
|         | 63 DVL3                   | CANCER  |         |
|         | 64 E-CADHERIN             | CANCER  | STROMAL |
|         | 68 EGFR_PY1068            |         | STROMAL |
|         | 77 FASN                   | CANCER  |         |
|         | 80 FOXO3A                 | STROMAL |         |
|         | 82 G6PD                   | CANCER  |         |
|         | 84 GAPDH                  | CANCER  |         |
|         | 89 HER2                   | CANCER  |         |
|         | 92 HER3_PY1289            | STROMAL |         |
|         | 95 IGFBP2                 |         | CANCER  |
|         | 96 INPP4B                 | CANCER  |         |
|         | 98 JNK_PT183_PY185        | STROMAL |         |
|         | 103 MAPK_PT202_Y204       |         | STROMAL |
|         | 106 MIG-6                 |         | CANCER  |
|         | 113 MYOSIN-IIA-PS1943     |         | STROMAL |
|         | 119 NOTCH1                | CANCER  |         |
|         | 121 P21                   | STROMAL |         |
|         | 123 P27_PT157             | STROMAL |         |
|         | 124 P27_PT198             | STROMAL |         |
|         | 125 P38                   | CANCER  |         |
|         | 126 P38_PT180_Y182        | STROMAL |         |
|         | 134 PAXILLIN              | CANCER  |         |
|         | 136 PDCD4                 | CANCER  |         |
|         | 141 PI3K-P110-ALPHA       | CANCER  |         |

|     |                     |         |         |
|-----|---------------------|---------|---------|
| 142 | PI3K-P85            |         | STROMAL |
| 143 | PKC-ALPHA           | STROMAL |         |
| 145 | PKC-DELTA_PS664     | STROMAL |         |
| 147 | PR                  |         | STROMAL |
| 157 | RB-M-QC_GBL11066224 | STROMAL |         |
| 167 | SHC_PY317           | CANCER  |         |
| 168 | SMAD1               |         | CANCER  |
| 169 | SMAD3               | STROMAL |         |
| 173 | SRC_PY527           | CANCER  | STROMAL |
| 180 | TRANSGLUTAMINASE    | STROMAL |         |
| 182 | TSC1                |         | STROMAL |
| 186 | VEGFR2              |         | CANCER  |
| 187 | VHL                 | CANCER  |         |
| 188 | XBP1                |         | STROMAL |
| 191 | YAP_PS127           |         | STROMAL |
| 193 | YB-1_PS102          | STROMAL |         |
